1 **Visible blue light inactivates SARS-CoV-2 variants and inhibits Delta replication in**  
2 **differentiated human airway epithelia**

3 Jacob Kocher<sup>1,#</sup>, Leslee Arwood<sup>1</sup>, Rachel C. Roberts<sup>1</sup>, Ibrahim Henson<sup>1</sup>, Abigail Annas<sup>1</sup>, David  
4 Emerson<sup>1</sup>, Nathan Stasko<sup>1</sup>, M. Leslie Fulcher<sup>2</sup>, Marisa Brotton<sup>2</sup>, Scott H. Randell<sup>2,3</sup>, Adam S.  
5 Cockrell<sup>1</sup>

6 <sup>1</sup> EmitBio Inc, 4222 Emperor Blvd, Suite 470, Durham, NC 27703

7 <sup>2</sup>The Marsico Lung Institute, The University of North Carolina at Chapel Hill, Chapel Hill, NC, USA

8 <sup>3</sup>Department of Cell Biology and Physiology, The University of North Carolina at Chapel Hill,  
9 Chapel Hill, NC, USA

10 #Corresponding author [jkocher@knowbiollc.com](mailto:jkocher@knowbiollc.com)

11

12 **Abstract**

13 The emergence of SARS-CoV-2 variants that evade host immune responses has prolonged the  
14 COVID-19 pandemic. Thus, the development of an efficacious, variant-agnostic therapeutic for  
15 the treatment of early SARS-CoV-2 infection would help reduce global health and economic  
16 burdens. Visible light therapy has the potential to fill these gaps. In this study, visible blue light  
17 centered around 425 nm efficiently inactivated SARS-CoV-2 variants in cell-free suspensions and  
18 in a translationally relevant well-differentiated tissue model of the human large airway.  
19 Specifically, 425 nm light inactivated cell-free SARS-CoV-2 variants Alpha, Beta, Delta, Gamma,  
20 Lambda, and Omicron by up to 99.99% in a dose-dependent manner, while the monoclonal  
21 antibody bamlanivimab did not neutralize the Beta, Delta, and Gamma variants. Further, we  
22 observed that 425 nm light reduced virus binding to host ACE-2 receptor and limited viral entry to  
23 host cells *in vitro*. Further, the twice daily administration of 32 J/cm<sup>2</sup> of 425 nm light for three days  
24 reduced infectious SARS-CoV-2 Beta and Delta variants by >99.99% in human airway models  
25 when dosing began during the early stages of infection. In more established infections, logarithmic  
26 reductions of infectious Beta and Delta titers were observed using the same dosing regimen.  
27 Finally, we demonstrated that the 425 nm dosing regimen was well-tolerated by the large airway  
28 tissue model. Our results indicate that blue light therapy has the potential to lead to a well-  
29 tolerated and variant-agnostic countermeasure against COVID-19.

30

31 **Keywords**

32 SARS-CoV-2, COVID-19, blue light, Delta, Omicron, variant

## 33 **Introduction**

34           In late 2019, the severe acute respiratory syndrome coronavirus 2 (SARS-CoV-2), the  
35 causative agent of Coronavirus Disease 2019 (COVID-19), emerged in Wuhan, China and rapidly  
36 spread around the globe, resulting in nearly 237 million confirmed cases and five million deaths  
37 (Ritchie et al., 2020). Due to hot spots of uncontrolled spread, novel variants have emerged  
38 displaying various combinations of increased replication, increased virulence, increased  
39 transmission, and the ability to evade immune response from previous infections or vaccination  
40 (Harvey et al., 2021; Krause et al., 2021). For example, the Beta variant was notable for its ability  
41 to evade monoclonal antibodies and serum neutralizing antibody responses (Wang et al., 2021).  
42 Similarly, the SARS-CoV-2 Delta and Omicron variants demonstrated combinations of increased  
43 transmission, virulence, and immune evasion and rapidly became the dominant global strains in  
44 early and late 2021, respectively, unleashing fresh “waves” of infections, hospitalizations,  
45 mortality, and economic instability (Y. Liu et al., 2021; Planas et al., 2021; Pouwels et al., 2021;  
46 Ren et al., 2022; Xu et al., 2021). Rising COVID-19 cases in regions across the world provides  
47 ample opportunity for new variants (e.g. Lambda and Mu) to emerge and further threaten global  
48 recovery (H. Liu et al., 2021; Ritchie et al., 2020).

49           Although much effort has been placed on the development of vaccines and therapeutics  
50 to reduce the prevalence and disease severity of COVID-19, additional countermeasures to return  
51 the world to pre-pandemic conditions are still needed. Several efficacious vaccines derived from  
52 the original, parental SARS-CoV-2 strain have been distributed, but <50% of the worldwide  
53 population is fully vaccinated (Ritchie et al., 2020), and recent studies have suggested waning  
54 protection in vaccinated individuals (Levin et al., 2021; Naaber et al., 2021). Therapeutic  
55 development, while also encouraging, has lagged. Several approaches have shown promise in  
56 laboratory or small-scale clinical studies with the best success in early onset disease and via a  
57 combination of therapeutic modalities (Caly et al., 2020; Liu et al., 2020; McCullough et al., 2021).  
58 The only therapeutics currently authorized by the Food and Drug Administration are therapeutic

59 monoclonal antibodies, molnupiravir, nirmatrelvir/ritonavir, and remdesivir, which have limitations  
60 including intravenous infusions, cost, susceptibility to variant escape, and questionable utility  
61 outside of specialized care facilities (Beigel et al., 2020; Jayk Bernal et al., 2021; Kumar et al.,  
62 2021). These limitations highlight a critical need for additional therapeutics in the fight against  
63 COVID-19, particularly for a variant-agnostic countermeasure that can be easily administered in  
64 the home setting. Visible light has the potential to fulfill this glaring need. McNeil and coworkers  
65 previously demonstrated the utility of visible 425 nm light targeted to the oropharynx and  
66 surrounding tissue as a possible at-home treatment for mild-to-moderate COVID-19 (Stasko et  
67 al., 2021a), but the broad utility of targeted blue light against SARS-CoV-2 variants of concern  
68 has not been established.

69 We previously reported that 425 nm blue light inactivates SARS-CoV-2 WA1 in cell-free  
70 and cell-associated formats at doses that are well-tolerated in a human tracheobronchial tissue  
71 model (Stasko et al., 2021b) and that also induce host IL-1 $\alpha$  and IL-1 $\beta$  gene expression in a  
72 human oral epithelial tissue model (Stasko et al., 2021a). Additionally, we demonstrated that  
73 human airway models can tolerate up to 256 J/cm<sup>2</sup> of 425 nm light given in a twice daily 32 J/cm<sup>2</sup>  
74 regimen for four days (Stasko et al., 2021b). The present study builds upon those seminal  
75 findings; herein we show that 425 nm blue light is capable of consistently inactivating each of the  
76 major SARS-CoV-2 variants tested to date. Further, we show that twice daily repeat dosing  
77 inhibits the replication of the Beta and Delta SARS-CoV-2 variants in a translationally relevant  
78 three-dimensional, differentiated model of human tracheobronchial epithelia. Our findings reveal  
79 the utility of safe, visible light as a variant-agnostic therapeutic for acute SARS-CoV-2 infection  
80 and detail its potential in treating infectious caused by SARS-CoV-2 variants.

81

## 82 **Methods**

83 **Cells, tissues, and viruses.** Vero E6 and A549 cells were purchased from ATCC. Vero E6 cells  
84 were maintained as previously described (Stasko et al., 2021b). A549 cells were maintained

85 according to ATCC instructions. Human adenovirus type 5 (VR-5) was acquired from the ATCC  
86 and passaged as previously described (Stasko et al., 2021b).

87 SARS-CoV-2 isolates WA1 (NR-52281), Alpha (NR-54000), Beta (NR-54009), Delta (NR-  
88 55611), Gamma (NR-54982), Lambda (NR-55654), and Omicron (NR-56461) were obtained  
89 through BEI Resources, National Institute of Allergy and Infectious Diseases, National Institutes  
90 of Health and passaged as previously described (Stasko et al., 2021b). All work with replication-  
91 competent SARS-CoV-2 was conducted with adherence to established safety guidelines at the  
92 CDC-certified biosafety level-3 facility at EmitBio, Inc.

93 The MatTek EpiAirway™ large airway epithelial models (donors AIR-100 and TBE-14)  
94 were acquired and handled as previously described (Stasko et al., 2021b). Primary human tissue  
95 models derived from large airway epithelial cells were also acquired from the Marsico Lung  
96 Institute Tissue Procurement and Cell Culture Core facility at the University of North Carolina at  
97 Chapel Hill (Donor DD065Q). The cells were cultured and differentiated on Millicell CM™ inserts  
98 in UNC air-liquid interface media as previously described (Fulcher and Randell, 2013). Cells were  
99 delivered in 12-well plates with agarose embedded in the basal compartment and revived as  
100 previously described (Stasko et al., 2021b). Cells were allowed to recover for 3-5 days prior to  
101 experimental initiation. Antiviral assays were conducted as previously described (Stasko et al.,  
102 2021b).

103 **Plaque assay.** Infectious viral titers for SARS-CoV-2 were enumerated via plaque assay as  
104 previously described (Stasko et al., 2021b). SARS-CoV-2 WA1 plaque assays were fixed and  
105 stained at 4 days post-infection and SARS-CoV-2 variants were fixed and stained at 5 days post-  
106 infection. Human adenovirus plaque assays were conducted on A549 cells with 1.2% colloidal  
107 microcrystalline cellulose overlay and developed 5 days post-infection.

108 **425 nm light plaque reduction neutralization test (PRNT).** Virus stocks were diluted to  $2 \times 10^5$   
109 PFU/mL (variants),  $2 \times 10^6$  PFU/ml (WA1), or  $2 \times 10^7$  PFU/mL (adenovirus) in media and illuminated

110 with the indicated doses of 425 nm light as previously described (Stasko et al., 2021b). Illuminated  
111 viral suspensions were titered via plaque assay as above.

112 **Monoclonal antibody PRNT.** Bamlanivimab (mAb LY-CoV555) was diluted to 4 µg/mL and  
113 serially diluted 1:2. SARS-CoV-2 stocks were diluted to 250 PFU/50 µl and 60 µL was added to  
114 each antibody dilution (final concentrations 2 µg/ml to 0.00391 µg/mL). Virus-antibody  
115 combinations were incubated for 1 hour at 37°C/5% CO<sub>2</sub> and then titered via plaque assay as  
116 above. Plaques were counted for each antibody dilution and for virus input; 50% and 90%  
117 neutralization cut off was determined based on the virus input.

118 **Binding ELISA.** Fifty µL (0.25 µg/mL) of human ACE-2 was added to Nickel Coated Assay Plates  
119 and incubated at room temperature for 1 h. SARS-CoV-2 Beta was diluted to 2x10<sup>5</sup> PFU/mL and  
120 illuminated (0 J/cm<sup>2</sup>, 15 J/cm<sup>2</sup>, and 90 J/cm<sup>2</sup>) as described above and then diluted 1:10000 in  
121 PBS. ACE-2 was removed from the wells and 50 µL of each virus suspension was added to each  
122 well and incubated for 1 h at room temperature. Fifty µL of 1:3000 diluted mouse anti-SARS-CoV-  
123 2 Spike Protein S1 monoclonal antibody (GT623, Invitrogen) in 1% BSA-PBS blocking buffer was  
124 added and incubated at room temperature for 30 min. Fifty µL of HRP-conjugated goat anti-mouse  
125 IgG diluted 1:2000 in 1% BSA-PBS blocking buffer was added to each well and incubated for 30  
126 minutes at room temperature. Plates were washed 3x with 0.5% PBS-Tween20 between each  
127 step above. Plates were developed with 1-Step Ultra TMB-ELISA for 15-30 minutes. Reactions  
128 were stopped with 2M sulfuric acid and read at 450 nm.

129 **Cell entry qPCR.** SARS-CoV-2 Beta was diluted to 2x10<sup>5</sup> PFU/mL and illuminated with 425 nm  
130 light (0 J/cm<sup>2</sup>, 15 J/cm<sup>2</sup>, and 90 J/cm<sup>2</sup>) as above. Vero E6 cells were inoculated with 200 µL of  
131 illuminated virus suspension and incubated for 1 h at 37°C/5% CO<sub>2</sub>. The inoculum was removed  
132 and cells washed 2x with PBS and 500 µL culture media (high glucose DMEM + 5% FBS (Gibco)  
133 + 1% antibiotic-antimycotic) was added to each well. Cells were incubated at 37°C/5% CO<sub>2</sub> and  
134 washed 2x with PBS prior to total RNA extraction. Total RNA was extracted at 3 hpi and 24 hpi  
135 with the RNeasy Mini Total RNA extraction kit (Qiagen). SARS-CoV-2 RNA was detected with the

136 CDC assay kit (IDT) and the TaqMan Fast Virus 1-Step Master Mix (ThermoFisher) on the  
137 QuantStudio3 System (Invitrogen).

138 **Statistical analysis.** Statistical significance for viral titers and cell cytotoxicity were determined  
139 using the Mann-Whitney ranked sum test using GraphPad Prism 8. Statistical significance is  
140 indicated by \* ( $p \leq 0.05$ ) and \*\* ( $p \leq 0.01$ ). For statistical purposes, all samples that were under  
141 the limit of detection were set to half the assay limit of detection.

142

## 143 **Results**

### 144 **Inactivation of SARS-CoV-2 variants assessed via plaque reduction neutralization tests** 145 **(PRNT)**

146 We previously demonstrated that 425 nm light inactivated highly pathogenic betacoronaviruses  
147 in cell-free suspensions (Stasko et al., 2021b). In this study, we expanded upon these findings by  
148 evaluating whether the same doses of 425 nm light inactivated a panel SARS-CoV-2 variants  
149 (Alpha, Beta, Delta, Gamma, Lambda, and Omicron) using the plaque reduction neutralization  
150 test (PRNT) (Figure 1). Similar to our previous report (Stasko et al., 2021b), 425 nm light reduced  
151 SARS-CoV-2 infectious titers in a dose-dependent manner:  $>1 \log_{10}$  at  $7.5 \text{ J/cm}^2$ ,  $>2 \log_{10}$  at  $15$   
152  $\text{J/cm}^2$ ,  $>3 \log_{10}$  at  $30 \text{ J/cm}^2$ , and  $>4 \log_{10}$  at  $60 \text{ J/cm}^2$  (Figures 2A-2G). We observed no inactivation  
153 of the non-enveloped DNA virus human adenovirus 5 (Figure 2H); we previously demonstrated  
154 that similar findings with human rhinovirus (Stasko et al., 2021b), suggesting these light doses  
155 do not damage viral RNA or viral DNA and work in an envelope-dependent mechanism.  
156 Additionally, we observed that basal media composition and sera supplementation had no impact  
157 on inactivation kinetics (Supplementary Figure 1), suggesting direct inactivation of the SARS-  
158 CoV-2 virion independent of potential differences in media composition (e.g. increased amino  
159 acids or lot-specific serum factors).

160 Previous studies have demonstrated that several variants evade neutralization by  
161 convalescent plasma and monoclonal antibody therapies (e.g. bamlanivimab) (Cao et al., 2021;

162 Cele et al., 2021; H. Liu et al., 2021; Planas et al., 2021; VanBlargan et al., 2022; Widera et al.,  
163 2021). Thus, bamlanivimab was included as a comparison to illustrate the evasion ability of  
164 replication-competent SARS-CoV-2 variants in our laboratory. In the present study, we observed  
165 that Beta, Delta, and Gamma evaded neutralization by bamlanivimab, but WA1 and Alpha did  
166 not, which is consistent with previous reports (Planas et al., 2021; Widera et al., 2021). When  
167 comparing the PRNT<sub>50</sub> and PRNT<sub>90</sub> titers for 425 nm light and bamlanivimab (Table 1), we  
168 observed that the PRNT<sub>50</sub> and PRNT<sub>90</sub> bamlanivimab titers for Beta, Delta, and Gamma were  
169  $\geq 128$  fold greater than WA1. Conversely the PRNT<sub>50</sub> and PRNT<sub>90</sub> doses of blue light for WA1,  
170 Alpha, Beta, Delta, Gamma, Lambda, and Omicron variants had similar PRNT<sub>50</sub> and PRNT<sub>90</sub>  
171 values, indicating that SARS-CoV-2 variants remain susceptible to 425 nm light inactivation.

#### 172 **425 nm light inactivates SARS-CoV-2 through inhibition of ACE-2 binding and cellular entry**

173 To investigate the mechanism of 425 nm light inactivation of cell-free SARS-CoV-2, cell-  
174 free SARS-CoV-2 Beta was illuminated with two doses of 425 nm light and its ability to bind ACE-  
175 2 and enter host cells was assessed (Figure 4). We selected a non-virucidal dose (15 J/cm<sup>2</sup>) and  
176 a high dose 50% above the reported virucidal dose (90 J/cm<sup>2</sup>) to ensure complete inactivation for  
177 these assays. To determine if illuminated virus maintained ACE-2 binding integrity, we conducted  
178 a human ACE-2 receptor-ligand binding assay (Figure 4A). Illumination with 425 nm light reduced  
179 SARS-CoV-2 Beta binding to ACE-2 in a dose-dependent manner, as 15 J/cm<sup>2</sup> reduced binding  
180 by ~80% and 90 J/cm<sup>2</sup> eliminated all ACE-2 binding.

181 Using the same light doses, we inoculated Vero E6 cells with virus that had been  
182 previously exposed to blue light and evaluated cell-associated SARS-CoV-2 viral replication via  
183 N1 qRT-PCR at 3 hpi (Figure 4B) and 24 hpi (Figure 4C). At 3 hpi, both doses significantly reduced  
184 detectable viral RNA compared to the unilluminated control. However, at 24 hpi, viral RNA from  
185 15 J/cm<sup>2</sup> had similar amounts of viral RNA as cells inoculated with unilluminated virus  
186 suspensions, suggesting that, while viral binding is reduced, these virions are still capable of  
187 undergoing replication. Conversely, SARS-CoV-2 illuminated with 90 J/cm<sup>2</sup> of 425 nm light had



188 significantly lower amounts of detectable viral RNA and did not change significantly from 3 hpi to  
189 24 hpi, indicating impaired viral entry into the host cell following complete inactivation. Gene  
190 expression normalized to host RNaseP confirmed these results; 15 J/cm<sup>2</sup> reduced detectable  
191 RNA by 2 logs at 3 hpi and 90 J/cm<sup>2</sup> reduced detectable RNA by 2 logs and 6 logs at 3 hpi and  
192 24 hpi, respectively (Figure 4D). We observed similar trends with the N2 qRT-PCR  
193 (Supplementary Figure 2A-C) and, as expected, did not observe a dose-dependent effect in  
194 RNaseP from Vero E6 cells (Supplementary Figure 2D-2E). These results indicate that 425 nm  
195 light inactivates SARS-CoV-2 by inhibiting viral binding and entry to the host cell.

#### 196 **425 nm light inhibits replication of the SARS-CoV-2 Beta variant in a human tissue infection** 197 **model**

198 To determine the best tissue model for screening 425 nm blue light against SARS-CoV-  
199 2-infected well-differentiated human airway epithelial tissues, we evaluated WA1 replication  
200 kinetics in multiple donor models from different suppliers (Supplementary Figure 3). SARS-CoV-  
201 2 replicated more consistently and to higher peak titers in the DD065Q model (UNC MLI) than in  
202 the AIR-100 and TBE-14 EpiAirway<sup>TM</sup> models. Additionally, the inhibition of WA1 replication  
203 following exposure to 425 nm light was evaluated in two separate model systems (DD065Q and  
204 TBE-14). In the TBE-14 model, 32 J/cm<sup>2</sup> reduced WA1 titers below the limit of detection compared  
205 to the 2 log<sub>10</sub> reduction observed in the DD065Q model. Since SARS-CoV-2 variants have  
206 demonstrated increased replication *in vitro* and *in vivo* (Arora et al., 2021; Cheng et al., 2021;  
207 Plante et al., 2021; Touret et al., 2021b), potentially narrowing the therapeutic window of new  
208 countermeasures, we selected the more stringent DD065Q model for the studies described  
209 herein. Thus, we treated SARS-CoV-2 Beta-infected tissues (MOI 0.1) with 32 J/cm<sup>2</sup> of 425 nm  
210 light once daily (QD) or twice daily (BID) starting at 3 hpi for three days (Figure 5A). While the QD  
211 regimen reduced titers by >1 log<sub>10</sub> at 72 hpi, the BID regimen reduced titers >4 log<sub>10</sub> at 72 hpi  
212 (Figure 5B). Importantly, the SARS-CoV-2 titers in BID-treated tissues decreased from 24 hpi to  
213 72 hpi, indicating the inhibition of the SARS-CoV-2 Beta replication. Additionally, we observed no

214 light-induced cytotoxicity in time-matched, uninfected tissues after 3 days of repeat dosing (Figure  
215 5C). These results demonstrate that a BID, but not QD, dosing regimen with 32 J/cm<sup>2</sup> of 425 nm  
216 light is sufficient to inhibit SARS-CoV-2 Beta in a well-differentiated airway tissue model.

217 **425 nm light inhibits SARS-CoV-2 Delta variant infection in a human tissue model**  
218 **regardless of MOI**

219 We next investigated whether the 32 J/cm<sup>2</sup> BID therapeutic approach was sufficient to  
220 control SARS-CoV-2 Delta infection at multiple starting infectious titers (MOIs 0.1, 0.01, and  
221 0.001) in the same model (Figure 6). Concordant with Beta, 32 J/cm<sup>2</sup> BID reduced Delta (MOI  
222 0.1) infectious titers by >4 log<sub>10</sub> at 72 hpi; infectious Delta titers also declined from 24 hpi to 72  
223 hpi (Figure 6A). At the lower MOIs, 425 nm light dramatically reduced infectious SARS-CoV-2  
224 Delta after 3 days of twice daily repeat dosing (below limit of detection) (Figures 6B and 6C).

225 The effects observed following administration of blue light during early infection (3 hpi)  
226 accurately reflect therapeutic potential early in the viral replication cycle but may not accurately  
227 reflect more established infections. To answer this question, we infected the tissue model with  
228 SARS-CoV-2 Beta or SARS-CoV-2 Delta (MOI 0.001) and delayed the first therapeutic dose to  
229 24 hpi. Even with a delayed first dose, 32 J/cm<sup>2</sup> BID effectively inhibited both variants in this  
230 model. A delayed first dose reduced Beta infectious titers by >1 log<sub>10</sub> at 48 hpi, by >2 log<sub>10</sub> at 72  
231 hpi, and by >3 log<sub>10</sub> at 96 hpi (Figure 7A). Similar results were seen with Delta; infectious titers  
232 were significantly reduced by >1log<sub>10</sub> at 48 hpi, by >1log<sub>10</sub> at 72 hpi, and by >2 log<sub>10</sub> at 96 hpi  
233 (Figure 7B). These results suggest that 425 nm light therapy can inhibit SARS-CoV-2 replication  
234 at multiple stages during the viral replication cycle.

235

236 **Discussion**

237 The rapid development and deployment of vaccines, improved standards of care, and  
238 increased focus on therapeutics have helped slow the spread of SARS-CoV-2 and the resulting  
239 worldwide economic burden. However, pockets of uncontrolled viral spread have led to the

240 emergence of novel variants that are able to evade exiting vaccines and therapeutics (Arora et  
241 al., 2021; Cele et al., 2021; H. Liu et al., 2021; Wang et al., 2021). It is expected that more will  
242 arise. Accordingly, novel therapeutics that will work broadly against all variants, including those  
243 that have not yet emerged, are needed.

244 The disease state at which the novel therapeutic would be most effective must also be  
245 considered. SARS-CoV-2 infects the oral cavity, upper respiratory tract, and large airway (Hou et  
246 al., 2020; Huang et al., 2021) prior to spread to the lower respiratory tract and the late-stage  
247 development of acute respiratory distress. Sustained replication in the oral and nasal cavities is  
248 likely a key contributor to the increased transmissibility of SARS-CoV-2 compared to other  
249 coronaviruses (Hou et al., 2020; Huang et al., 2021; Marchesan et al., 2021). For these reasons,  
250 a targeted approach for acute SARS-CoV-2 infection of the upper airway epithelia to halt  
251 progression via the oral-lung transmission axis is an attractive aim. A therapeutic that works  
252 during the early stages of infection is not only essential to reduce disease burden in the treated  
253 individual, but also to limit person-to-person transmission.

254 Previously, we showed that 425 nm light inhibited SARS-CoV-2 WA1 in human tissue  
255 models of both oral and large airway epithelia with no damage to healthy tissue (Stasko et al.,  
256 2021b, 2021a). In this report, we show that 425 nm light can not only inactivate all SARS-CoV-2  
257 variants of concern in cell-free suspensions, but targeted energy densities inhibit SARS-CoV-2  
258 infections at multiple stages of infection in tissue models of human airway epithelia. Three-  
259 dimensional, differentiated primary cell culture models of human airway epithelia are more  
260 effective systems to evaluate therapeutic efficacy and safety than conventional two-dimensional  
261 immortalized cell culture systems (e.g. Vero cells) (Do et al., 2021; Heinen et al., 2021; Touret et  
262 al., 2021a). Similar models have been used in the evaluation of several anti-SARS-CoV-2  
263 therapeutics, including molnupiravir (Sheahan et al., 2020), remdesivir (Pruijssers et al., 2020),  
264 and AT-511 (Good et al., 2021). Further, detection of infectious viruses in the apical washes can  
265 serve as a surrogate for virus shedding during infection. To this end, the proper model must be

266 selected as different patient donors, primary cell culture conditions, and differentiation protocols  
267 can impact model development (Fulcher and Randell, 2013; Sellgren et al., 2014). For example,  
268 primary cells cultured on PTFE surfaces are more differentiated and more ciliated than primary  
269 cells cultured on PET surfaces (Sellgren et al., 2014). In our previous study, we demonstrated  
270 that the EpiAirway™ model (AIR-100) can withstand a single dose of 120 J/cm<sup>2</sup> of 425 nm (Stasko  
271 et al., 2021b), but this model does not support sufficient SARS-CoV-2 WA1 replication for  
272 therapeutic exploration (Supplementary Figure 3A). The most effective model screened for these  
273 studies was developed at the Marsico Lung Institute at the University of North Carolina-Chapel  
274 Hill (Fulcher and Randell, 2013) where SARS-CoV-2 replication in the model displayed more  
275 consistent replication kinetics and higher peak titers than in the widely available AIR-100  
276 EpiAirway™ model, providing a more robust model for therapeutic efficacy and safety evaluations  
277 in this study.

278         While we have previously demonstrated safety and therapeutic efficacy against WA1,  
279 several variants have replaced the parental strain. Mutations within the viral Spike, such as L18F,  
280 E484K, and N501Y, have been associated with escape from immune evasion (Cele et al., 2021;  
281 Gong et al., 2021; Harvey et al., 2021; Motozono et al., 2021; Widera et al., 2021). Herein we  
282 demonstrate inactivation of a panel of SARS-CoV-2 variants containing these mutations,  
283 indicating these mutations do not convey viral resistance to blue light inactivation. To evaluate  
284 light therapy against circulating variants of concern in a human tissue model, we selected the  
285 Beta and Delta variants due to their immune evasion and public health impacts (Pouwels et al.,  
286 2021). For both variants, early (Figures 5 and 6) or delayed (Figure 7) administration of twice daily  
287 32 J/cm<sup>2</sup> of 425 nm light for three days successfully inhibited productive infections. These results  
288 suggest that targeted 425 nm light therapy has potential treatment utility to control acute SARS-  
289 CoV-2 infections, reduce symptomatic disease and viral load, and may reduce person-to-person  
290 transmission after infection. These preclinical feasibility studies demonstrate the promising  
291 potential of 425 nm light therapy against SARS-CoV-2 variants and have led to the evaluation of

292 an investigational treatment device currently being explored in randomized, controlled trials in  
293 outpatients with COVID-19 (“Evaluation of the RD-X19 treatment device in individuals with mild-  
294 to-moderate COVID-19.” n.d.).

### 295 **Acknowledgments**

296 We thank BEI Resources for providing the SARS-CoV-2 variants. We thank Dr. John McNeil,  
297 M.D. and Judy Stein for acquisition of bamlanivimab. We thank the EmitBio engineering team  
298 (Thomas M. Womble, Emily Keller, Soren Emerson, Michael Lay, P. Joseph DeSena, Haley  
299 Ritchie, and Fred Kamau) for developing and providing the biological light units. Figures 1 and 5A  
300 were created with BioRender.com

### 301 **Funding**

302 The Marsico Lung Institute Tissue Procurement Cell Culture Core at UNC is funded by the Cystic  
303 Fibrosis Foundation at UNC (CFFBOUCHE19R0) and the NIH CFRTCC Cell Models Core at UNC  
304 (NIH P30DK065988).

### 305 **Conflicts of interest statement**

306 Authors J.K., L.A., R.C.R., I.H., A.A., D.E., N.S., A.S.C. conducted this work on behalf of EmitBio  
307 Inc. through their employment relationship with EmitBio’s parent company, KNOWBio, LLC, and  
308 may have ownership interests in one or both companies. All patents and applications arising from  
309 these findings are assigned to KNOWBio, LLC.

310

311

312 **Figure legends**

313 **Figure 1. Scheme of Plaque Reduction Neutralization Test (PRNT) for 425 nm light and**  
314 **bamlanivimab.**

315 Biological light units were configured to evenly distribute light over the entire surface area of a 24-  
316 well plate and used to evaluate various energy densities in the classic PRNT assay method to  
317 measure inactivation of cell-free SARS-CoV-2. SARS-CoV-2 variants were diluted and illuminated  
318 with (A) a fixed dose of 425 nm light per experiment or (B) incubated with serially diluted  
319 bamlanivimab prior to infectious titer enumeration with plaque assay.

320 **Figure 2. 425 nm light inactivates up to 99.99% of cell-free SARS-CoV-2 variants in a dose-**  
321 **dependent manner, but not human rhinovirus or human adenovirus.** Cell-free suspensions  
322 of SARS-CoV-2 (A) WA1, (B) Alpha, (C) Beta, (D) Delta, (E) Gamma, (F) Lambda, and (G)  
323 Omicron and (H) human adenovirus type 5 were illuminated with 425 nm light and enumerated  
324 via plaque assay. Data presented are mean viral titers +/- SD (n = 5-6). Statistical significance  
325 was determined via Mann-Whitney ranked sum test and is indicated by \* ( $p \leq 0.05$ ) and \*\* ( $p \leq 0.01$ ).

326 **Figure 3. SARS-CoV-2 variants Beta, Delta, and Gamma evade neutralization by the**  
327 **monoclonal antibody therapeutic bamlanivimab.** The neutralization capability of  
328 bamlanivimab with cell-free SARS-CoV-2 variants (WA1, Alpha, Beta, Delta, and Gamma) was  
329 determined by the plaque reduction neutralization test. Cell-free SARS-CoV-2 variants were  
330 incubated with varying concentrations of bamlanivimab and viral titers were enumerated via  
331 plaque assay. Data presented are the mean percent neutralization +/- SD (n = 4) across  
332 bamlanivimab concentrations ( $\mu\text{g/mL}$ ).

333 **Figure 4. 425 nm light inhibits cell-free SARS-CoV-2 cell entry in an ACE-2-dependent**  
334 **manner.** (A) Cell-free suspensions of SARS-CoV-2 Beta were illuminated with 0  $\text{J/cm}^2$ , 15  $\text{J/cm}^2$ ,  
335 or 90  $\text{J/cm}^2$  of 425 nm light. Illuminated samples were evaluated for binding to ACE-2 via ELISA  
336 (n = 4). Data presented are normalized ACE-2 binding (relative to 0  $\text{J/cm}^2$ ) +/- SEM. (B) Vero E6  
337 cells were inoculated with cell-free suspensions of SARS-CoV-2 Beta following illumination with

338 0 J/cm<sup>2</sup>, 15 J/cm<sup>2</sup>, and 90 J/cm<sup>2</sup> of 425 nm light. At 3 hpi and 24 hpi, total RNA was extracted  
339 from inoculated cultures for qRT-PCR analysis using the CDC N1 primer/probe set (n = 4). Data  
340 presented are mean Ct +/- SD (n = 4) for the N1 probe at (B) 3 hpi and (C) 24 hpi and (D)  
341 normalized N1 relative to host RNase P. Statistical significance was determined via the Mann-  
342 Whitney ranked sum test and is indicated by \* (p≤0.05) and \*\* (p≤0.01).

343 **Figure 5. Twice daily exposures of 32 J/cm<sup>2</sup> of 425 nm light inhibit productive SARS-CoV-**  
344 **2 Beta infection and is well-tolerated in a primary human airway tissue model.** (A) Well-  
345 differentiated primary human airway tissue models were infected with SARS-CoV-2 Beta (MOI  
346 0.1) and illuminated once (QD) or twice daily (BID) for 3 days with 32 J/cm<sup>2</sup> of 425 nm light starting  
347 at 3 hours post-infection. (B) Apical rinses were collected daily and enumerated via plaque assay.  
348 Data presented are mean viral titer (PFU/mL) +/- SD (n = 6). (C) Uninfected tissues were treated  
349 in parallel with twice daily doses of 32 J/cm<sup>2</sup> of 425 nm light for three days and cytotoxicity was  
350 evaluated via MTT assay at 72 hours after the first exposure. Data presented are mean viability  
351 +/- SD (n = 6). Statistical significance was determined with the Mann-Whitney ranked sum test  
352 and is indicated by \* (p≤0.05) and \*\* (p≤0.01).

353 **Figure 6. Twice daily exposures of 32 J/cm<sup>2</sup> light inhibits productive SARS-CoV-2 Delta**  
354 **infection in the early stages of viral infection of a primary human airway tissue model.** Well-  
355 differentiated primary human airway tissue models were infected with SARS-CoV-2 Delta at (A)  
356 MOI 0.1, (B) MOI 0.01, and (C) MOI 0.001 and illuminated twice daily for three days with 32 J/cm<sup>2</sup>  
357 of 425 nm light starting at 3 hours post-infection. Apical rinses were collected daily and  
358 enumerated via plaque assay. Data presented are mean viral titer (PFU/mL) +/- SD (n = 6).  
359 Statistical significance was determined with the Mann-Whitney ranked sum test and is indicated  
360 by \*\* (p≤0.01).

361 **Figure 7. 425 nm light inhibits productive SARS-CoV-2 Beta and Delta infection during later**  
362 **stages of viral infection in a primary human airway tissue model.** Well-differentiated primary  
363 human airway tissue models were infected with SARS-CoV-2 Beta or Delta (MOI 0.001) and

364 illuminated twice daily for 3 days with 32 J/cm<sup>2</sup> of 425 nm light starting at 24 hours post-infection.  
365 Apical rinses were collected daily and enumerated via plaque assay. Data presented are mean  
366 viral titer (PFU/mL) +/- SD (n = 6) for Beta (A) and Delta (B). Statistical significance was  
367 determined with the Mann-Whitney ranked sum test and is indicated by \*\* (p≤0.01).  
368



369 **Table 1. Bamlanivimab and 425nm light PRNT<sub>50</sub> and PRNT<sub>90</sub> values**

|                | Bamlanivimab       |                      |                    |                      | 425nm light        |                      |                    |                      |
|----------------|--------------------|----------------------|--------------------|----------------------|--------------------|----------------------|--------------------|----------------------|
|                | PRNT <sub>50</sub> |                      | PRNT <sub>90</sub> |                      | PRNT <sub>50</sub> |                      | PRNT <sub>90</sub> |                      |
|                | [µg/mL]            | Fold change over WA1 | [µg/mL]            | Fold change over WA1 | J/cm <sup>2</sup>  | Fold change over WA1 | J/cm <sup>2</sup>  | Fold change over WA1 |
| <b>WA1</b>     | 0.022              | 0                    | 0.063              | 0                    | 2.8                | 0                    | 6.2                | 0                    |
| <b>Alpha</b>   | 0.011              | <1                   | 0.045              | <1                   | 2.4                | <0                   | 4.7                | <0                   |
| <b>Beta</b>    | >2                 | >256 <sup>A</sup>    | >2                 | >256                 | 1.9                | <0                   | 5.3                | <0                   |
| <b>Delta</b>   | >1                 | >128                 | >2                 | >256                 | 2.2                | <0                   | 5.6                | <0                   |
| <b>Gamma</b>   | >2                 | >256                 | >2                 | >256                 | 1.2                | <0                   | 2.9                | <0                   |
| <b>Lambda</b>  | ND*                | ND                   | ND                 | ND                   | 2.5                | <0                   | 6.2                | <0                   |
| <b>Omicron</b> | ND                 | ND                   | ND                 | ND                   | 2.2                | <0                   | 4.0                | <0                   |

370 \*ND = not determined, Lambda and Omicron evasion of bamlanivimab neutralization has been  
 371 reported (Cao et al., 2021; H. Liu et al., 2021; VanBlargan et al., 2022)

372 <sup>A</sup> For samples >2 µg/mL, values were set to 4 for calculation of fold change

373 **References**

- 374 Arora, P., Sidarovich, A., Krüger, N., Kempf, A., Nehlmeier, I., Graichen, L., Moldenhauer, A.-S.,  
375 Winkler, M.S., Schulz, S., Jäck, H.-M., Stankov, M. v., Behrens, G.M.N., Pöhlmann, S.,  
376 Hoffmann, M., 2021. B.1.617.2 enters and fuses lung cells with increased efficiency and  
377 evades antibodies induced by infection and vaccination. *Cell Reports* 37, 109825.  
378 <https://doi.org/10.1016/j.celrep.2021.109825>
- 379 Beigel, J.H., Tomashek, K.M., Dodd, L.E., Mehta, A.K., Zingman, B.S., Kalil, A.C., Hohmann, E.,  
380 Chu, H.Y., Luetkemeyer, A., Kline, S., Lopez de Castilla, D., Finberg, R.W., Dierberg, K.,  
381 Tapsen, V., Hsieh, L., Patterson, T.F., Paredes, R., Sweeney, D.A., Short, W.R., Touloumi,  
382 G., Lye, D.C., Ohmagari, N., Oh, M., Ruiz-Palacios, G.M., Benfield, T., Fätkenheuer, G.,  
383 Kortepeter, M.G., Atmar, R.L., Creech, C.B., Lundgren, J., Babiker, A.G., Pett, S., Neaton,  
384 J.D., Burgess, T.H., Bonnett, T., Green, M., Makowski, M., Osinusi, A., Nayak, S., Lane,  
385 H.C., 2020. Remdesivir for the Treatment of Covid-19 — Preliminary Report. *New England*  
386 *Journal of Medicine*. <https://doi.org/10.1056/nejmoa2007764>
- 387 Caly, L., Druce, J.D., Catton, M.G., Jans, D.A., Wagstaff, K.M., 2020. The FDA-approved drug  
388 ivermectin inhibits the replication of SARS-CoV-2 in vitro. *Antiviral Research* 178.
- 389 Cao, Y., Wang, J., Jian, F., Xiao, T., Song, W., Yisimayi, A., Huang, W., Li, Q., Wang, P., An,  
390 R., Wang, Yao, Niu, X., Yang, S., Liang, H., Sun, H., Li, T., Yu, Y., Cui, Q., Liu, S., Yang,  
391 X., Du, S., Zhang, Z., Hao, X., Shao, F., Jin, R., Wang, X., Xiao, J., Wang, Youchun, Xie,  
392 S., 2021. Omicron escapes the majority of existing SARS-CoV-2 neutralizing antibodies.  
393 *Nature*. <https://doi.org/10.1038/s41586-021-04385-3>
- 394 Cele, S., Gazy, I., Jackson, L., Hwa, S.H., Tegally, H., Lustig, G., Giandhari, J., Pillay, S.,  
395 Wilkinson, E., Naidoo, Y., Karim, F., Ganga, Y., Khan, K., Bernstein, M., Balazs, A.B.,  
396 Gosnell, B.I., Hanekom, W., Moosa, M.Y.S., Abrahams, S., Alcantara, L.C.J., Alisoltani-  
397 Dehkordi, A., Allam, M., Bhiman, J.N., Davies, M.A., Doolabh, D., Engelbrecht, S.,  
398 Fonseca, V., Giovanetti, M., Glass, A.J., Godzik, A., Goedhals, D., Hardie, D., Hsiao, M.,  
399 Iranzadeh, A., Ismail, A., Korsman, S., Pond, S.L.K., Laguda-Akingba, O., Lourenco, J.,  
400 Marais, G., Martin, D., Maslo, C., Mlisana, K., Mohale, T., Msomi, N., Mudau, I.,  
401 Petruccione, F., Preiser, W., San, E.J., Sewell, B.T., Tyers, L., van Zyl, G., von Gottberg,  
402 A., Walaza, S., Weaver, S., Wibmer, C.K., Williamson, C., York, D., Archary, M., Dullabh,  
403 K.J., Goulder, P., Harilall, S., Harling, G., Harrichandparsad, R., Herbst, K., Jeena, P.,  
404 Khoza, T., Klein, N., Kløverpris, H., Leslie, A., Madansein, R., Marakalala, M., Mazibuko,  
405 M., Moshabela, M., Mthabela, N., Naidoo, K., Ndhlovu, Z., Ndung'u, T., Nyamande, K.,  
406 Padayatchi, N., Patel, V., Ramjit, D., Rodel, H., Smit, T., Steyn, A., Wong, E., Lessells,  
407 R.J., de Oliveira, T., Sigal, A., 2021. Escape of SARS-CoV-2 501Y.V2 from neutralization  
408 by convalescent plasma. *Nature* 593, 142–146. <https://doi.org/10.1038/s41586-021-03471->  
409 [w](https://doi.org/10.1038/s41586-021-03471-w)
- 410 Cheng, Y.-W., Chao, T.-L., Li, C.-L., Wang, S.-H., Kao, H.-C., Tsai, Y.-M., Wang, H.-Y., Hsieh,  
411 C.-L., Lin, Y.-Y., Chen, P.-J., Chang, S.-Y., Yeh, S.-H., 2021. D614G Substitution of SARS-  
412 CoV-2 Spike Protein Increases Syncytium Formation and Virus Titer via Enhanced Furin-  
413 Mediated Spike Cleavage. *mBio* 12. <https://doi.org/10.1128/mBio>
- 414 Do, T.N.D., Donckers, K., Vangeel, L., Chatterjee, A.K., Gallay, P.A., Bobardt, M.D., Bilello,  
415 J.P., Cihlar, T., de Jonghe, S., Neyts, J., Jochmans, D., 2021. A robust SARS-CoV-2

- 416 replication model in primary human epithelial cells at the air liquid interface to assess  
417 antiviral agents. *Antiviral Research* 192. <https://doi.org/10.1016/j.antiviral.2021.105122>
- 418 Evaluation of the RD-X19 treatment device in individuals with mild-to-moderate COVID-19.  
419 [WWW Document], n.d. . *ClinicalTrials.gov Identifier: NCT04966013*. URL  
420 <https://clinicaltrials.gov/ct2/show/NCT04966013> (accessed 10.31.21).
- 421 Fulcher, M.L., Randell, S.H., 2013. Human Nasal and Tracheo-Bronchial Respiratory Epithelial  
422 Cell Culture, in: *Methods in Molecular Biology*. pp. 109–121. [https://doi.org/10.1007/978-1-62703-125-7\\_8](https://doi.org/10.1007/978-1-62703-125-7_8)
- 424 Gong, S.Y., Chatterjee, D., Richard, J., Prévost, J., Tauzin, A., Gasser, R., Bo, Y., Vézina, D.,  
425 Goyette, G., Gendron-Lepage, G., Medjahed, H., Roger, M., Côté, M., Finzi, A., 2021.  
426 Contribution of single mutations to selected SARS-CoV-2 emerging variants spike  
427 antigenicity. *Virology* 563, 134–145. <https://doi.org/10.1016/j.virol.2021.09.001>
- 428 Good, S.S., Westover, J., Jung, K.H., Zhou, X.J., Moussa, A., la Colla, P., Collu, G., Canard, B.,  
429 Sommadossi, J.P., 2021. AT-527, a double prodrug of a guanosine nucleotide analog, is a  
430 potent inhibitor of SARS-CoV-2 in vitro and a promising oral antiviral for treatment of covid-  
431 19. *Antimicrobial Agents and Chemotherapy* 65. <https://doi.org/10.1128/AAC.02479-20>
- 432 Harvey, W.T., Carabelli, A.M., Jackson, B., Gupta, R.K., Thomson, E.C., Harrison, E.M.,  
433 Ludden, C., Reeve, R., Rambaut, A., Peacock, S.J., Robertson, D.L., 2021. SARS-CoV-2  
434 variants, spike mutations and immune escape. *Nature Reviews Microbiology*.  
435 <https://doi.org/10.1038/s41579-021-00573-0>
- 436 Heinen, N., Klöhn, M., Steinmann, E., Pfaender, S., 2021. In vitro lung models and their  
437 application to study sars-cov-2 pathogenesis and disease. *Viruses*.  
438 <https://doi.org/10.3390/v13050792>
- 439 Hou, Y.J., Okuda, K., Edwards, C.E., Martinez, D.R., Asakura, T., Dinnon, K.H., Kato, T., Lee,  
440 R.E., Yount, B.L., Mascenik, T.M., Chen, G., Olivier, K.N., Ghio, A., Tse, L. v., Leist, S.R.,  
441 Gralinski, L.E., Schäfer, A., Dang, H., Gilmore, R., Nakano, S., Sun, L., Fulcher, M.L.,  
442 Livraghi-Butrico, A., Nicely, N.I., Cameron, M., Cameron, C., Kelvin, D.J., de Silva, A.,  
443 Margolis, D.M., Markmann, A., Bartelt, L., Zumwalt, R., Martinez, F.J., Salvatore, S.P.,  
444 Borczuk, A., Tata, P.R., Sontake, V., Kimple, A., Jaspers, I., O’Neal, W.K., Randell, S.H.,  
445 Boucher, R.C., Baric, R.S., 2020. SARS-CoV-2 Reverse Genetics Reveals a Variable  
446 Infection Gradient in the Respiratory Tract. *Cell* 182, 429-446.e14.  
447 <https://doi.org/10.1016/j.cell.2020.05.042>
- 448 Huang, N., Pérez, P., Kato, T., Mikami, Y., Okuda, K., Gilmore, R.C., Conde, C.D., Gasmi, B.,  
449 Stein, S., Beach, M., Pelayo, E., Maldonado, J.O., Lafont, B.A., Jang, S.I., Nasir, N.,  
450 Padilla, R.J., Murrah, V.A., Maile, R., Lovell, W., Wallet, S.M., Bowman, N.M., Meinig, S.L.,  
451 Wolfgang, M.C., Choudhury, S.N., Novotny, M., Aevermann, B.D., Scheuermann, R.H.,  
452 Cannon, G., Anderson, C.W., Lee, R.E., Marchesan, J.T., Bush, M., Freire, M., Kimple,  
453 A.J., Herr, D.L., Rabin, J., Grazioli, A., Das, S., French, B.N., Pranzatelli, T., Chiorini, J.A.,  
454 Kleiner, D.E., Pittaluga, S., Hewitt, S.M., Burbelo, P.D., Chertow, D., Kleiner, D.E., de  
455 Melo, M.S., Dikoglu, E., Desai, S., Ylaya, K., Chung, J.Y., Smith, G., Chertow, D.S.,  
456 Vannella, K.M., Ramos-Benitez, M., Ramelli, S.C., Samet, S.J., Babyak, A.L., Valenica,  
457 L.P., Richert, M.E., Hays, N., Purcell, M., Singireddy, S., Wu, J., Chung, J., Borth, A.,

- 458 Bowers, K., Weichold, A., Tran, D., Madathil, R.J., Krause, E.M., Herr, D.L., Rabin, J.,  
459 Herrold, J.A., Tabatabai, A., Hochberg, E., Cornachione, C., Levine, A.R., McCurdy, M.T.,  
460 Saharia, K.K., Chancer, Z., Mazzeffi, M.A., Richards, J.E., Eagan, J.W., Sangwan, Y.,  
461 Sequeira, I., A. Teichmann, S., J. Kimple, A., Frank, K., Lee, J., Boucher, R.C., Teichmann,  
462 S.A., Warner, B.M., Byrd, K.M., 2021. SARS-CoV-2 infection of the oral cavity and saliva.  
463 *Nature Medicine* 27, 892–903. <https://doi.org/10.1038/s41591-021-01296-8>
- 464 Jayk Bernal, A., Gomes da Silva, M., Musungaie, D., Kovalchuk, E., Gonzalez, A., Delos Reyes,  
465 V., Martin-Quiros, A., Caraco, Y., Williams-Diaz, A., Brown, M., Du, J., Pedley, A., Assaid,  
466 C., Strizki, J., Grobler, J., Shamsuddin, H., Tipping, R., Wan, H., Paschke, A., Butterton, J.,  
467 Johnson, M., de Anda, , C, 2021. Molnupiravir for Oral Treatment of Covid-19 in  
468 Nonhospitalized Patients. *The New England Journal of Medicine*.  
469 <https://doi.org/10.1056/NEJMoa2116044>
- 470 Krause, P.R., Fleming, T.R., Longini, I.M., Peto, R., Briand, S., Heymann, D.L., Beral, V.,  
471 Snape, M.D., Rees, H., Ropero, A.-M., Balicer, R.D., Cramer, J.P., Munoz-Fontela, C.,  
472 Gruber, M., Gaspar, R., Singh, J.A., Subbarao, K., van Kerkhove, M.D., Swaminathan, S.,  
473 Ryan, M.J., Henao-Restrepo, A.-M., 2021. SARS-CoV-2 Variants and Vaccines. *The New*  
474 *England Journal of Medicine* 385.
- 475 Kumar, S., Chandele, A., Sharma, A., 2021. Current status of therapeutic monoclonal antibodies  
476 against SARS-CoV-2 \_ Enhanced Reader. *PLoS Pathogens* 17.  
477 <https://doi.org/https://doi.org/10.1371/journal.ppat.1009885>
- 478 Levin, E.G., Lustig, Y., Cohen, C., Fluss, R., Indenbaum, V., Amit, S., Doolman, R., Asraf, K.,  
479 Mendelson, E., Ziv, A., Rubin, C., Freedman, L., Kreiss, Y., Regev-Yochay, G., 2021.  
480 Waning Immune Humoral Response to BNT162b2 Covid-19 Vaccine over 6 Months. *The*  
481 *New England Journal of Medicine*.
- 482 Liu, H., Wei, P., Zhang, Q., Aviszus, K., Linderberger, J., Yang, J., Liu, J., Chen, Z., Waheed,  
483 H., Reynoso, L., Downey, G.P., Frankel, S.K., Kappler, J., Marrack, P., Zhang, G., 2021.  
484 The Lambda variant of SARS-CoV-2 has a better chance than the Delta variant to escape  
485 vaccines. *bioRxiv : the preprint server for biology*.  
486 <https://doi.org/10.1101/2021.08.25.457692>
- 487 Liu, J., Cao, R., Xu, M., Wang, X., Zhang, H., Hu, H., Li, Y., Hu, Z., Zhong, W., Wang, M., 2020.  
488 Hydroxychloroquine, a less toxic derivative of chloroquine, is effective in inhibiting SARS-  
489 CoV-2 infection in vitro. *Cell Discovery*. <https://doi.org/10.1038/s41421-020-0156-0>
- 490 Liu, Y., Liu, J., Johnson, B.A., Xia, H., Ku, Z., Widen, S.G., An, Z., Weaver, S.C., Menachery,  
491 V.D., Xie, X., Shi, P.-Y., 2021. Delta spike P681R mutation enhances SARS-CoV-2 fitness  
492 over Alpha variant 1. *bioRxiv*. <https://doi.org/10.1101/2021.08.12.456173>
- 493 Marchesan, J.T., Warner, B.M., Byrd, K.M., 2021. The “oral” history of COVID-19: Primary  
494 infection, salivary transmission, and post-acute implications. *Journal of Periodontology*.  
495 <https://doi.org/10.1002/JPER.21-0277>
- 496 McCullough, P.A., Kelly, R.J., Ruocco, G., Lerma, E., Tumlin, J., Wheelan, K.R., Katz, N.,  
497 Lepor, N.E., Vijay, K., Carter, H., Singh, B., McCullough, S.P., Bhambi, B.K., Palazzuoli, A.,  
498 de Ferrari, G.M., Milligan, G.P., Safder, T., Tecson, K.M., Wang, D.D., McKinnon, J.E.,  
499 O’Neill, W.W., Zervos, M., Risch, H.A., 2021. Pathophysiological Basis and Rationale for

- 500 Early Outpatient Treatment of SARS-CoV-2 (COVID-19) Infection. *American Journal of*  
501 *Medicine*. <https://doi.org/10.1016/j.amjmed.2020.07.003>
- 502 Motozono, C., Toyoda, M., Zahradnik, J., Saito, A., Nasser, H., Tan, T.S., Ngare, I., Kimura, I.,  
503 Uriu, K., Kosugi, Y., Yue, Y., Shimizu, R., Ito, J., Torii, S., Yonekawa, A., Shimono, N.,  
504 Nagasaki, Y., Minami, R., Toya, T., Sekiya, N., Fukuhara, T., Matsuura, Y., Schreiber, G.,  
505 Ikeda, T., Nakagawa, S., Ueno, T., Sato, K., 2021. SARS-CoV-2 spike L452R variant  
506 evades cellular immunity and increases infectivity. *Cell Host and Microbe* 29, 1124-  
507 1136.e11. <https://doi.org/10.1016/j.chom.2021.06.006>
- 508 Naaber, P., Tserel, L., Kangro, K., Sepp, E., Jürjenson, V., Adamson, A., Haljasmägi, L., Rumm,  
509 A.P., Maruste, R., Kärner, J., Gerhold, J.M., Planken, A., Ustav, M., Kisand, K., Peterson,  
510 P., 2021. Dynamics of antibody response to BNT162b2 vaccine after six months: a  
511 longitudinal prospective study. *The Lancet Regional Health - Europe* 100208.  
512 <https://doi.org/10.1016/j.lanepe.2021.100208>
- 513 Planas, D., Veyer, D., Baidaliuk, A., Staropoli, I., Guivel-Benhassine, F., Rajah, M.M.,  
514 Planchais, C., Porrot, F., Robillard, N., Puech, J., Prot, M., Gallais, F., Gantner, P., Velay,  
515 A., le Guen, J., Kassis-Chikhani, N., Edriss, D., Belec, L., Seve, A., Courtellemont, L.,  
516 Péré, H., Hocqueloux, L., Fafi-Kremer, S., Prazuck, T., Mouquet, H., Bruel, T., Simon-  
517 Lorière, E., Rey, F.A., Schwartz, O., 2021. Reduced sensitivity of SARS-CoV-2 variant  
518 Delta to antibody neutralization. *Nature* 596, 276–280. [https://doi.org/10.1038/s41586-021-](https://doi.org/10.1038/s41586-021-03777-9)  
519 [03777-9](https://doi.org/10.1038/s41586-021-03777-9)
- 520 Plante, J.A., Liu, Y., Liu, J., Xia, H., Johnson, B.A., Lokugamage, K.G., Zhang, X., Muruato,  
521 A.E., Zou, J., Fontes-Garfias, C.R., Mirchandani, D., Scharton, D., Bilello, J.P., Ku, Z., An,  
522 Z., Kalveram, B., Freiberg, A.N., Menachery, V.D., Xie, X., Plante, K.S., Weaver, S.C., Shi,  
523 P.Y., 2021. Spike mutation D614G alters SARS-CoV-2 fitness. *Nature* 592, 116–121.  
524 <https://doi.org/10.1038/s41586-020-2895-3>
- 525 Pouwels, K.B., Pritchard, E., Matthews, P.C., Stoesser, N., Eyre, D.W., Vihta, K.-D., House, T.,  
526 Hay, J., Bell, J.I., Newton, J.N., Farrar, J., Crook, D., Cook, D., Rourke, E., Studley, R.,  
527 Peto, T.E.A., Diamond, I., Walker, A.S., 2021a. Effect of Delta variant on viral burden and  
528 vaccine effectiveness against new SARS-CoV-2 infections in the UK. *Nature Medicine*.
- 529 Pouwels, K.B., Pritchard, E., Matthews, P.C., Stoesser, N., Eyre, D.W., Vihta, K.-D., House, T.,  
530 Hay, J., Bell, J.I., Newton, J.N., Farrar, J., Crook, D., Cook, D., Rourke, E., Studley, R.,  
531 Peto, T.E.A., Diamond, I., Walker, A.S., 2021b. Effect of Delta variant on viral burden and  
532 vaccine effectiveness against new SARS-CoV-2 infections in the UK. *Nature Medicine*.  
533 <https://doi.org/10.1038/s41591-021-01548-7>
- 534 Pruijssers, A.J., George, A.S., Schäfer, A., Leist, S.R., Gralinski, L.E., Dinno, K.H., Yount, B.L.,  
535 Agostini, M.L., Stevens, L.J., Chappell, J.D., Lu, X., Hughes, T.M., Gully, K., Martinez,  
536 D.R., Brown, A.J., Graham, R.L., Perry, J.K., du Pont, V., Pitts, J., Ma, B., Babusis, D.,  
537 Murakami, E., Feng, J.Y., Bilello, J.P., Porter, D.P., Cihlar, T., Baric, R.S., Denison, M.R.,  
538 Sheahan, T.P., 2020. Remdesivir Inhibits SARS-CoV-2 in Human Lung Cells and Chimeric  
539 SARS-CoV Expressing the SARS-CoV-2 RNA Polymerase in Mice. *Cell Reports* 32,  
540 107940. <https://doi.org/10.1016/j.celrep.2020.107940>

- 541 Ren, S.-Y., Wang, W.-B., Gao, R.-D., Zhou, A.-M., 2022. World Journal of Clinical Cases  
542 Omicron variant (B.1.1.529) of SARS-CoV-2: Mutation, infectivity, transmission, and  
543 vaccine resistance. *World J Clin Cases* 10, 1–11. <https://doi.org/10.12998/wjcc.v10.i1.1>
- 544 Ritchie, H., Mathieu, E., Rodes-Guirao, L., Appel, C., Giattino, C., Ortiz-Ospina, E., Hasell, J.,  
545 Macdonald, B., Beltekian, D., Roser, M., 2020. Coronavirus Pandemic (COVID-19) [WWW  
546 Document]. *OurWorldinData.org*.
- 547 Sellgren, K.L., Butala, E.J., Gilmour, B.P., Randell, S.H., Grego, S., 2014. A biomimetic  
548 multicellular model of the airways using primary human cells. *Lab Chip* 14.  
549 <https://doi.org/10.1039/C4LC00552J>
- 550 Sheahan, T.P., Sims, A.C., Zhou, S., Graham, R.L., Pruijssers, A.J., Agostini, M.L., Leist, S.R.,  
551 Schäfer, A., Dinnon Iii, K.H., Stevens, L.J., Chappell, J.D., Lu, X., Hughes, T.M., George,  
552 A.S., Hill, C.S., Montgomery, S.A., Brown, A.J., Bluemling, G.R., Natchus, M.G., Saindane,  
553 M., Kolykhalov, A.A., Painter, G., Harcourt, J., Tamin, A., Thornburg, N.J., Swanstrom, R.,  
554 Denison, M.R., Baric, R.S., 2020. An orally bioavailable broad-spectrum antiviral inhibits  
555 SARS-CoV-2 in human airway epithelial cell cultures and multiple coronaviruses in mice,  
556 *Sci. Transl. Med.*
- 557 Stasko, N., Cockrell, A.S., Kocher, J.F., Henson, I., Emerson, D., Wang, Y., Smith, J.R.,  
558 Henderson, N.H., Wood, H., Bradrick, S.S., Jones, T.M., Santander, J.L., McNeil, J.G.,  
559 2021a. A randomized, controlled, feasibility study of RD-X19 in patients with mild-to-  
560 moderate COVID-19 in the outpatient setting. *medRxiv: the preprint server for health*  
561 *sciences*.
- 562 Stasko, N., Kocher, J.F., Annas, A., Henson, I., Seitz, T.S., Miller, J., Arwood, L., Roberts, R.C.,  
563 Womble, T.M., Keller, E.G., Emerson, S., Bergmann, M., Sheesley, A.N.Y., Strong, R.J.,  
564 Hurst, B.L., Emerson, D., Tarbet, E.B., Bradrick, S.S., Cockrell, A.S., 2021b. Visible blue  
565 light inhibits infection and replication of SARS-CoV-2 at doses that are well-tolerated by  
566 human respiratory tissue. *Scientific Reports* 11.
- 567 Touret, F., Driouich, J.S., Cochin, M., Petit, P.R., Gilles, M., Barthélémy, K., Moureau, G.,  
568 Mahon, F.X., Malvy, D., Solas, C., de Lamballerie, X., Nougairède, A., 2021a. Preclinical  
569 evaluation of Imatinib does not support its use as an antiviral drug against SARS-CoV-2.  
570 *Antiviral Research* 193. <https://doi.org/10.1016/j.antiviral.2021.105137>
- 571 Touret, F., Luciani, L., Baronti, C., Cochin, M., Driouich, J.S., Gilles, M., Thirion, L., Nougairède,  
572 A., de Lamballerie, X., 2021b. Replicative fitness of a sars-cov-2 20i/501y.V1 variant from  
573 lineage b.1.1.7 in human reconstituted bronchial epithelium. *mBio* 12.  
574 <https://doi.org/10.1128/mBio.00850-21>
- 575 VanBlargan, L.A., Errico, J.M., Halfmann, P.J., Zost, S.J., Crowe, J.E., Purcell, L.A., Kawaoka,  
576 Y., Corti, D., Fremont, D.H., Diamond, M.S., 2022. An infectious SARS-CoV-2 B.1.1.529  
577 Omicron virus escapes neutralization by therapeutic monoclonal antibodies. *Nature*  
578 *Medicine* 1–6. <https://doi.org/10.1038/s41591-021-01678-y>
- 579 Wang, P., Nair, M.S., Liu, L., Iketani, S., Luo, Y., Guo, Y., Wang, M., Yu, J., Zhang, B., Kwong,  
580 P.D., Graham, B.S., Mascola, J.R., Chang, J.Y., Yin, M.T., Sobieszczyk, M., Kyratsous,  
581 C.A., Shapiro, L., Sheng, Z., Huang, Y., Ho, D.D., 2021. Antibody resistance of SARS-

582 CoV-2 variants B.1.351 and B.1.1.7. *Nature* 593, 130–135. [https://doi.org/10.1038/s41586-](https://doi.org/10.1038/s41586-021-03398-2)  
583 021-03398-2

584 Widera, M., Wilhelm, A., Hoehl, S., Pallas, C., Kohmer, N., Wolf, T., Rabenau, H.F., Corman,  
585 V.M., Drosten, C., Vehreschild, M.J.G.T., Goetsch, U., Gottschalk, R., Ciesek, S., 2021.  
586 Limited Neutralization of Authentic Severe Acute Respiratory Syndrome Coronavirus 2  
587 Variants Carrying E484K In Vitro. *The Journal of Infectious Diseases*.  
588 <https://doi.org/10.1093/infdis/jiab355>

589 Xu, Z., Liu, K., Gao, G.F., 2021. Omicron variant of SARS-CoV-2 imposes a new challenge for  
590 the global public health. <https://doi.org/10.1016/j.bsheal.2022.01.002>

591

592

Figure 1. Scheme of Plaque Reduction Neutralization Test (PRNT) for 425 nm light and bamlanivimab

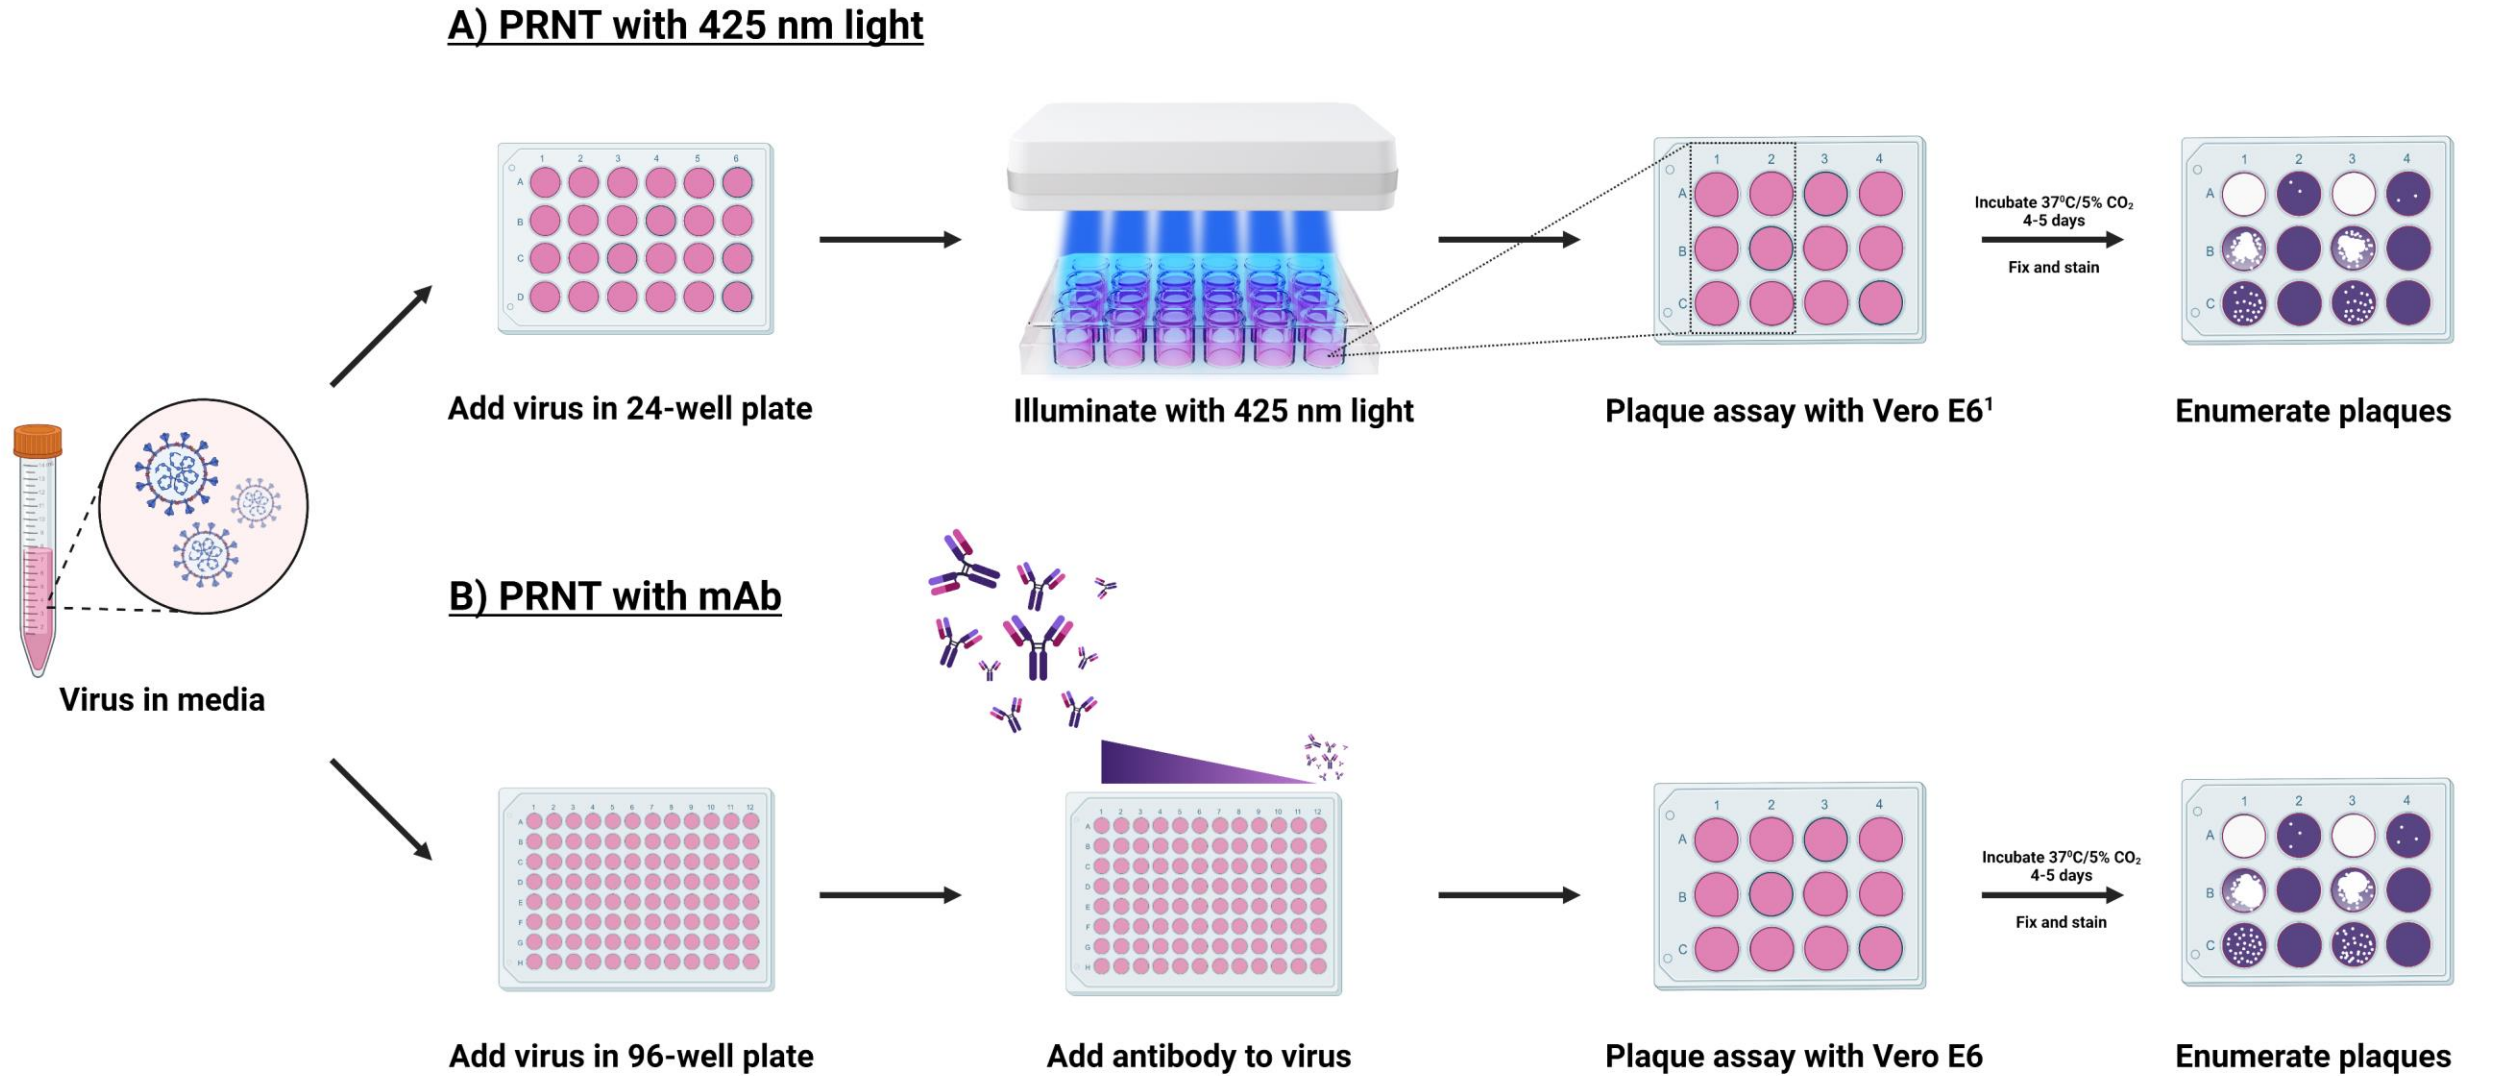

<sup>1</sup>A549 cells for adenovirus



Figure 2. 425 nm light inactivates up to 99.99% of cell-free SARS-CoV-2 variants in a dose-dependent manner, but not human adenovirus.

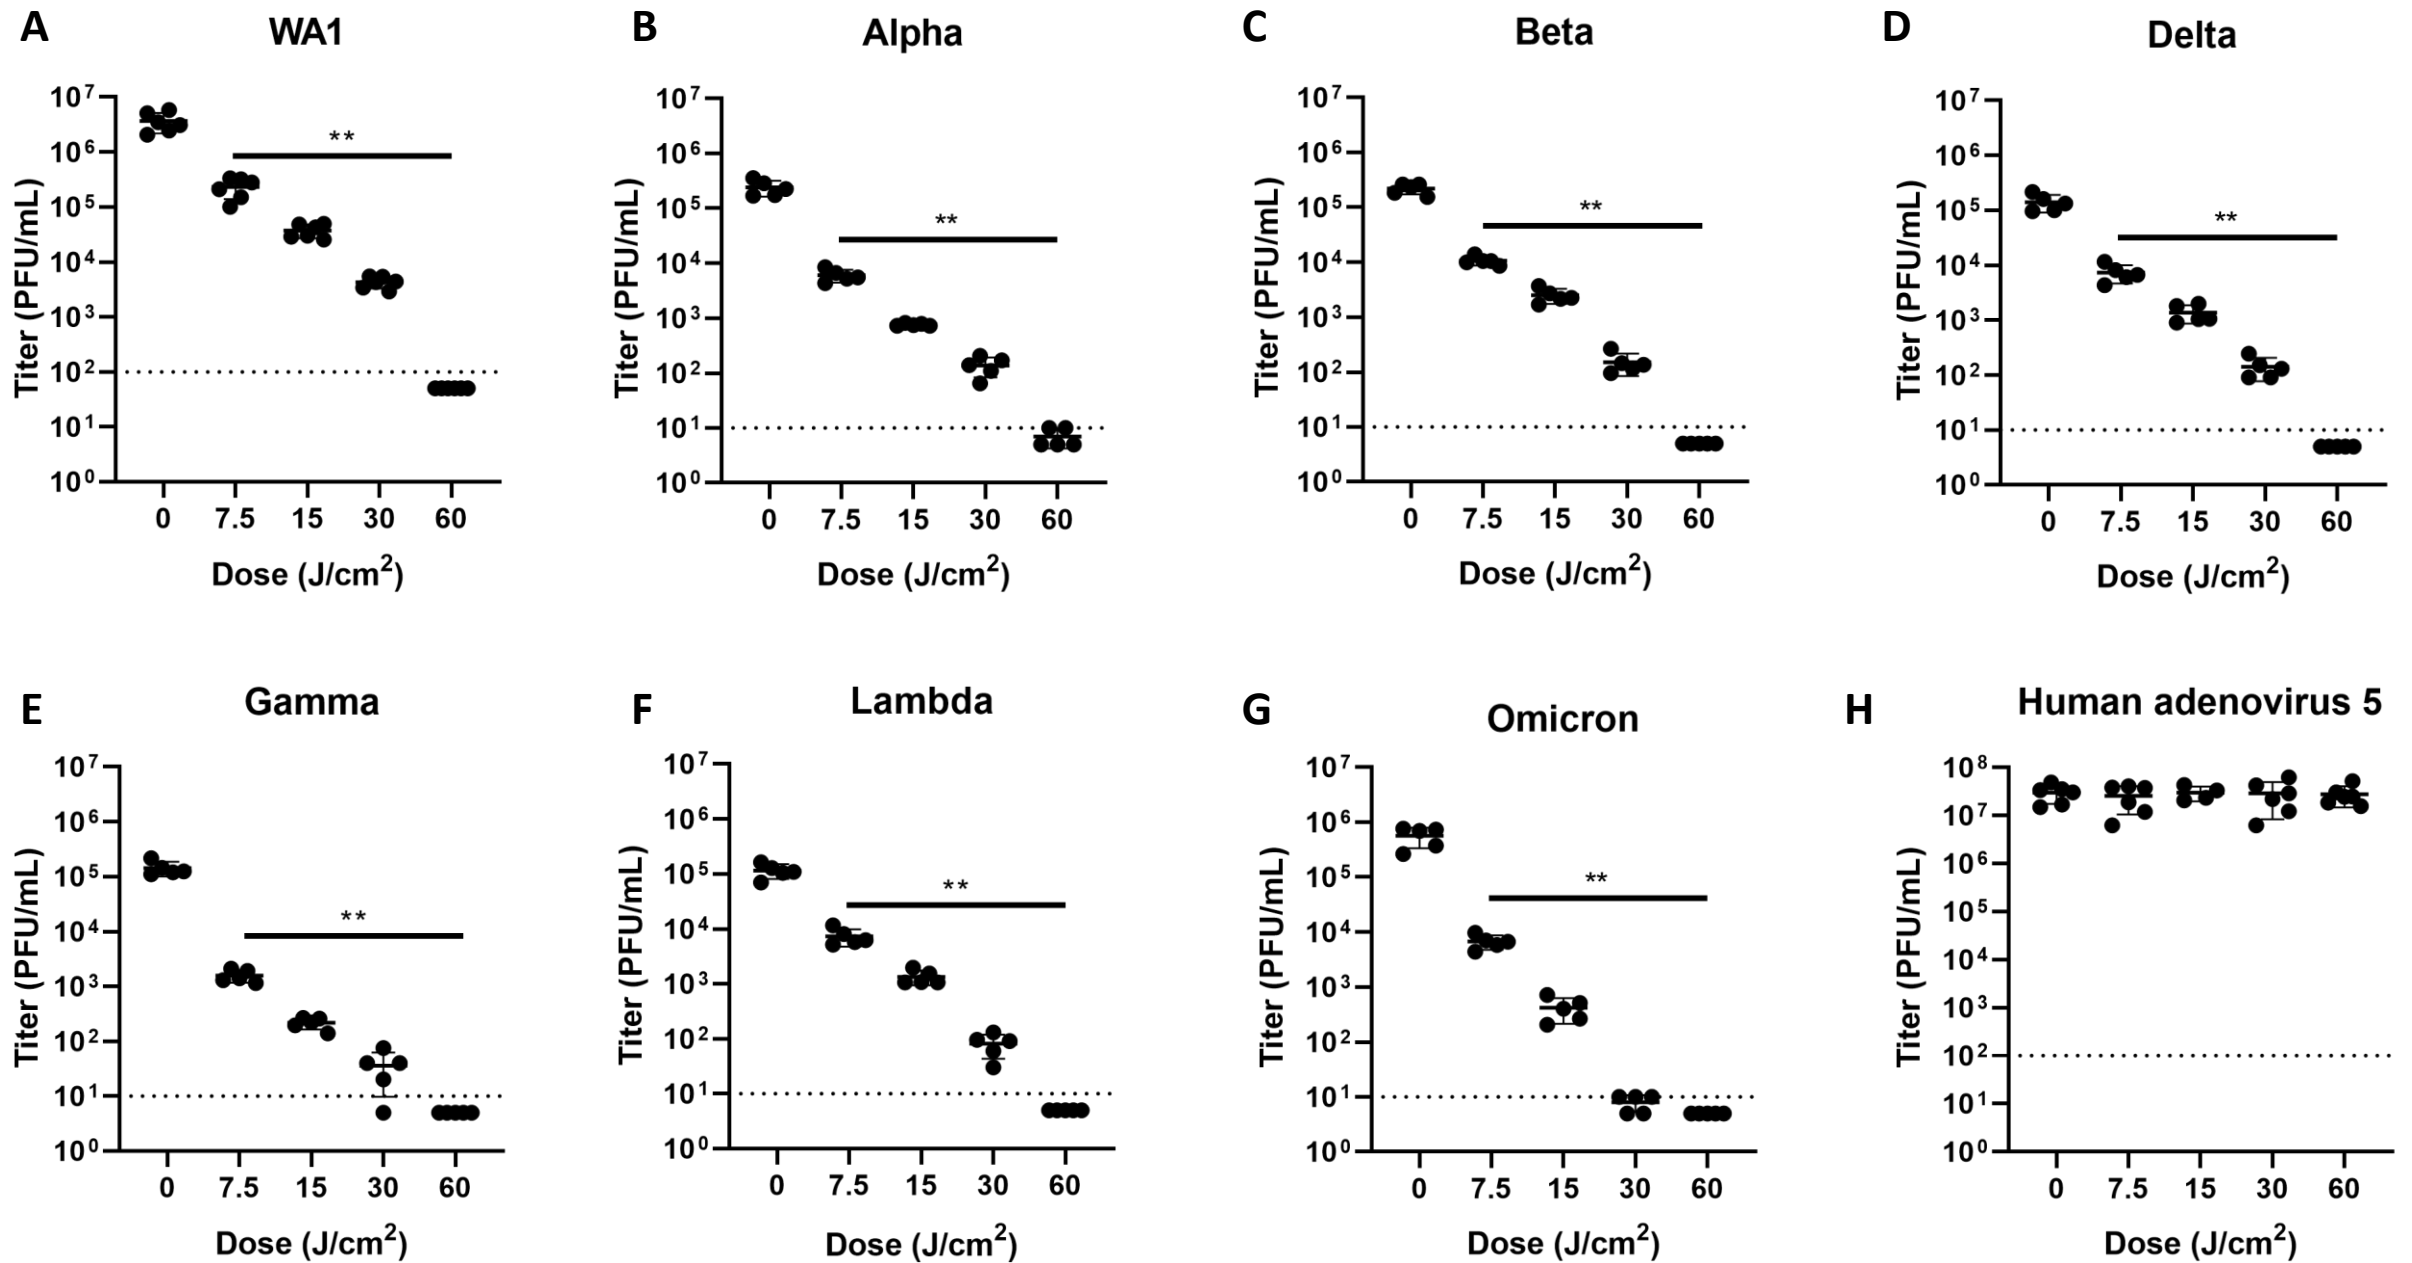

Figure 3. SARS-CoV-2 variants Beta, Delta, and Gamma evade neutralization by the monoclonal antibody therapeutic bamlanivimab.

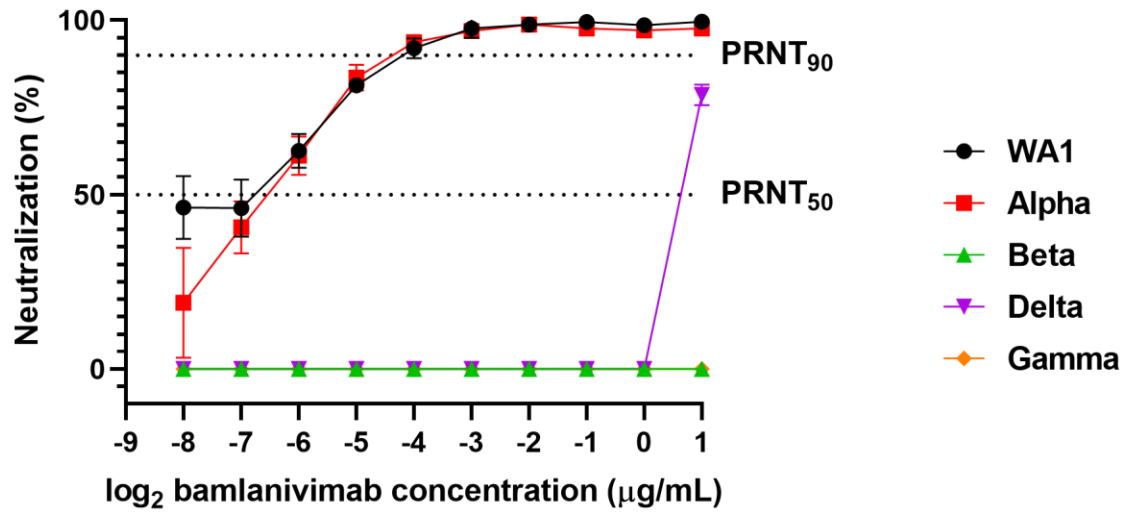

Figure 4. 425 nm light inhibits cell-free SARS-CoV-2 cell entry in an ACE-2-dependent manner.

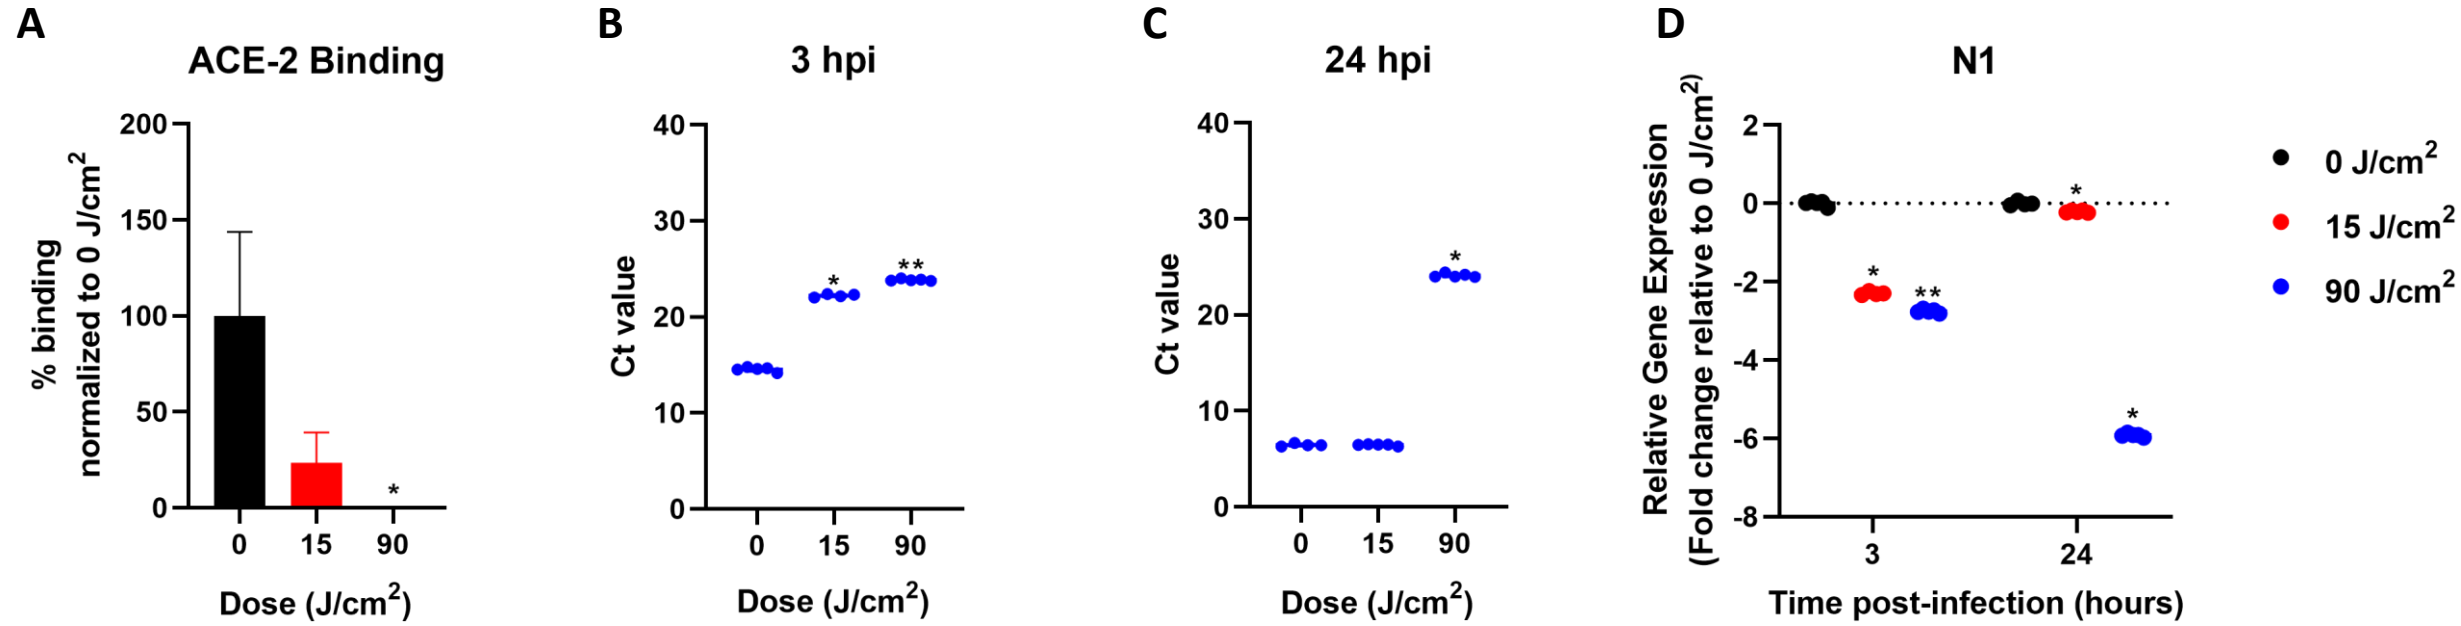

Figure 5. Twice daily exposures of 32 J/cm<sup>2</sup> of 425 nm light inhibit productive SARS-CoV-2 Beta infection and is well-tolerated in a primary human airway tissue model

**A**

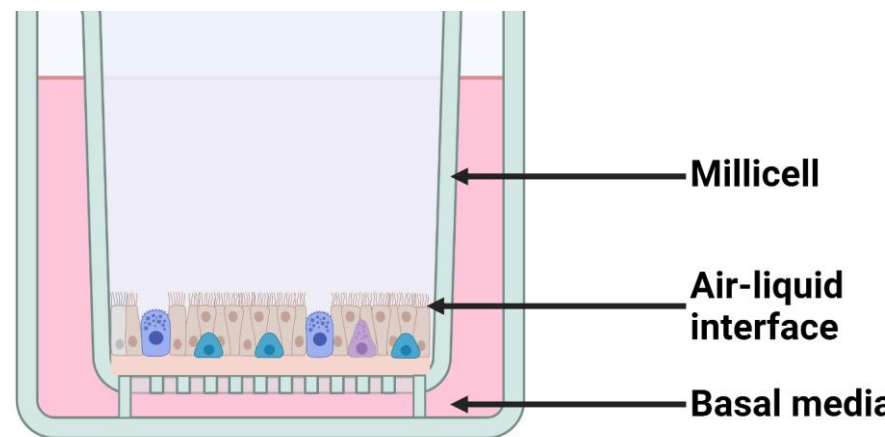

425 nm QD experimental scheme and dosing regimen

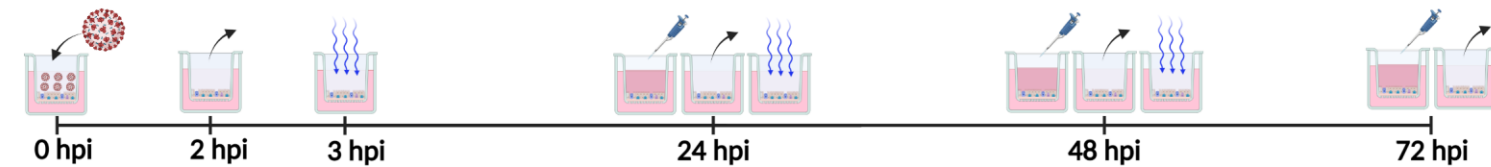

425 nm BID experimental scheme and dosing regimen

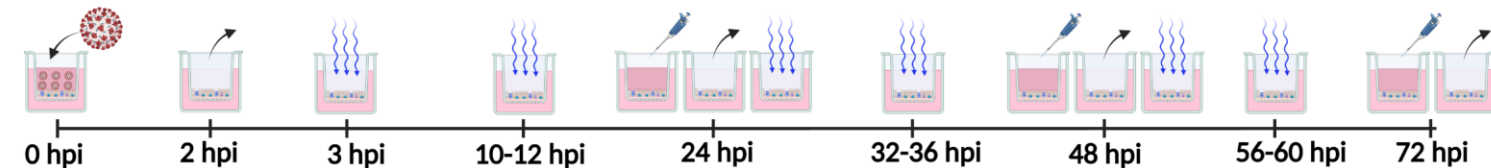

Key

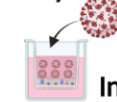

Inoculation: Beta (MOI 0.1), incubate 37°C/5% CO<sub>2</sub> for 2 h

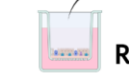

Remove media from apical surface

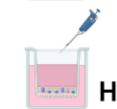

Harvest: Add 200 μL diluent, incubate 37°C/5% CO<sub>2</sub> for 30 min

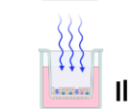

Illumination with 425 nm light

**B**

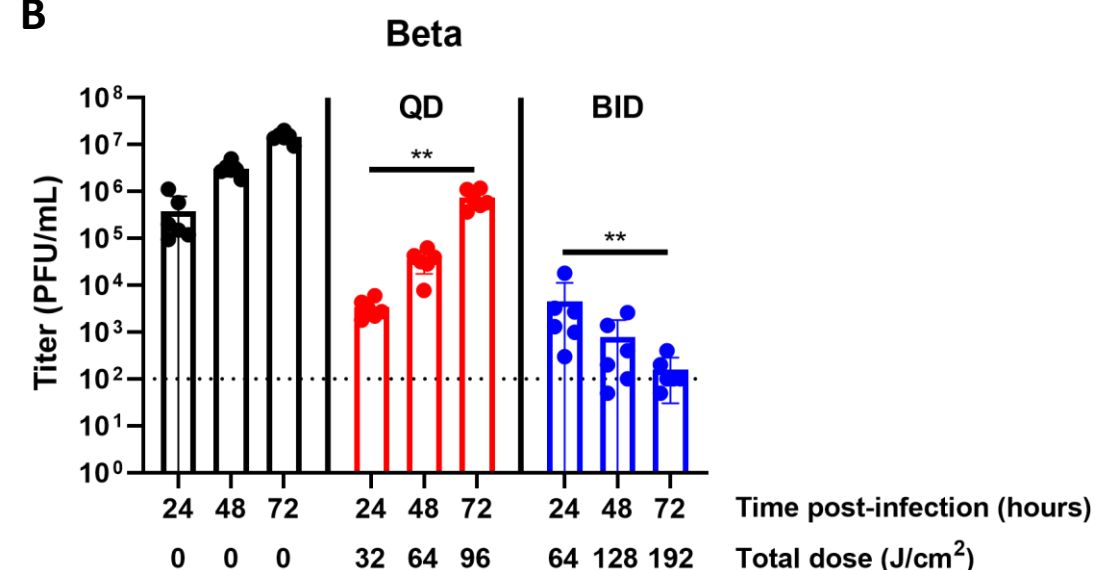

**C**

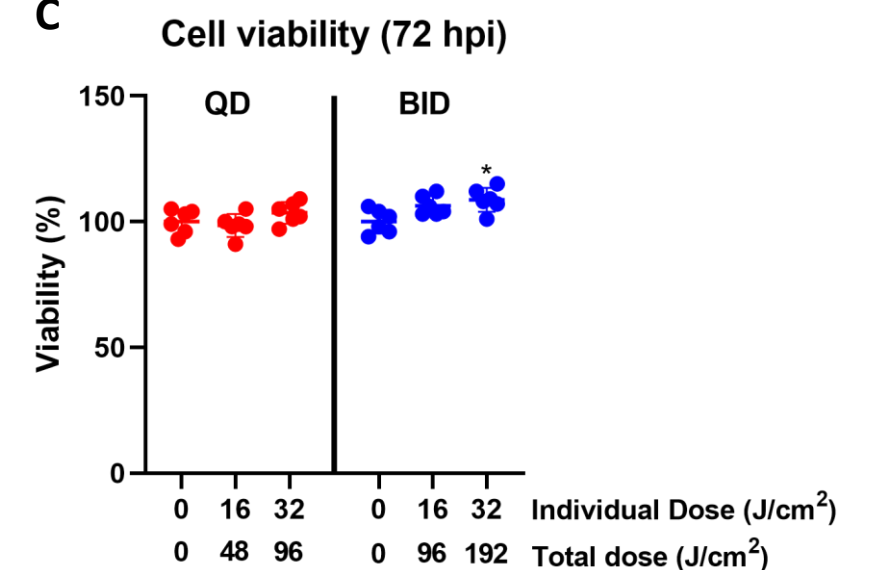

Figure 6. Twice daily exposures of 32 J/cm<sup>2</sup> light inhibits productive SARS-CoV-2 Delta infection in the early stages of viral infection of a primary human airway tissue model.

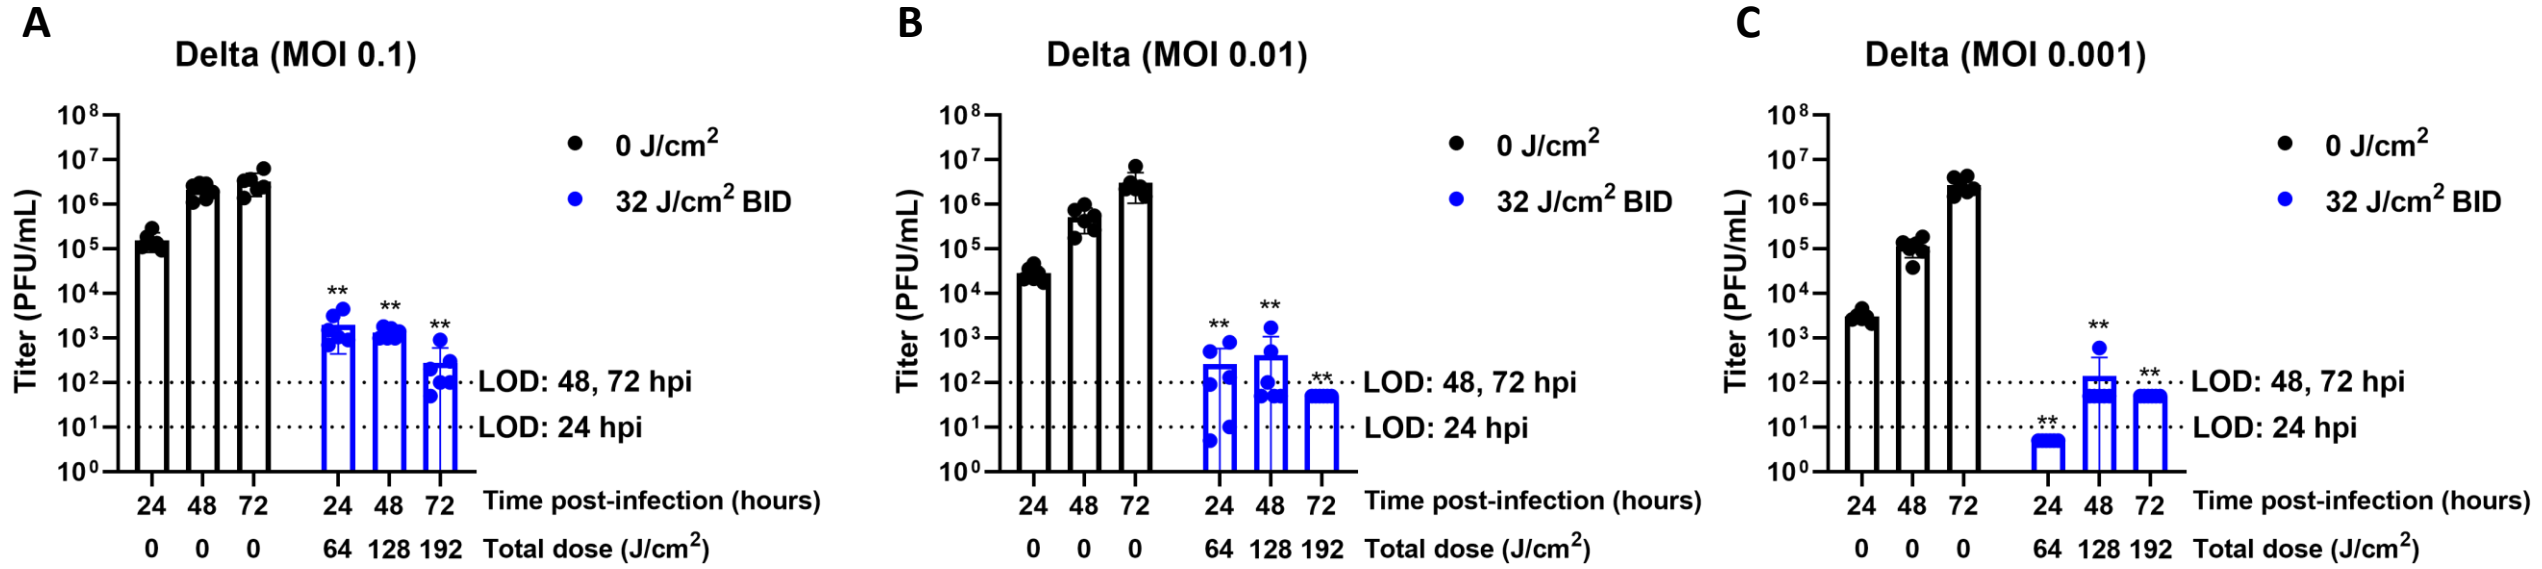

Figure 7. 425 nm light inhibits productive SARS-CoV-2 Beta and Delta infection during later stages of viral infection in a primary human airway tissue model.

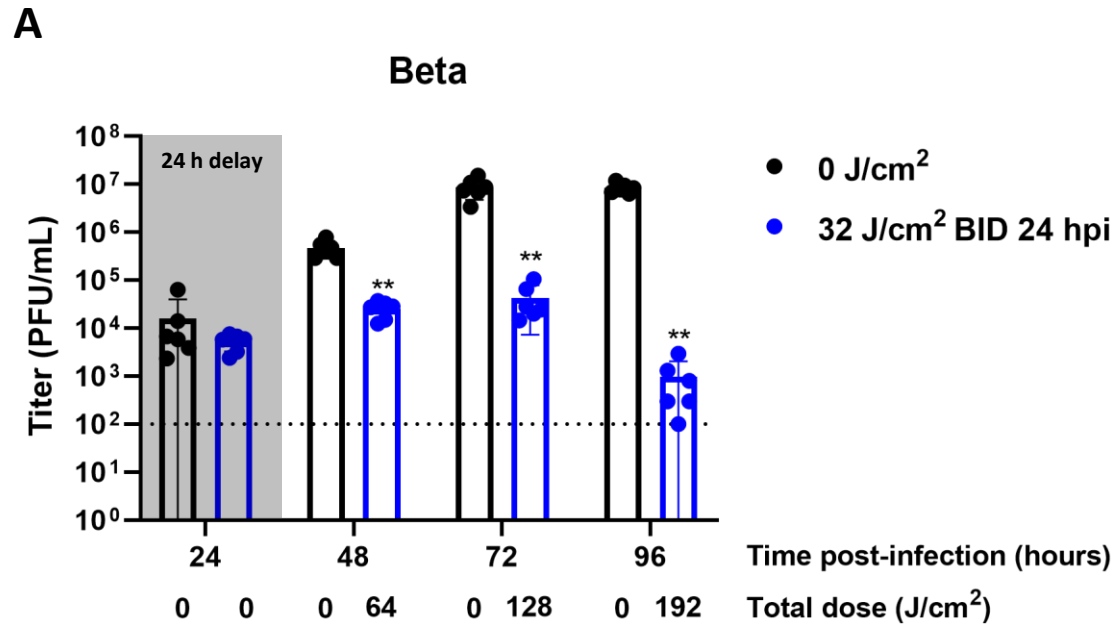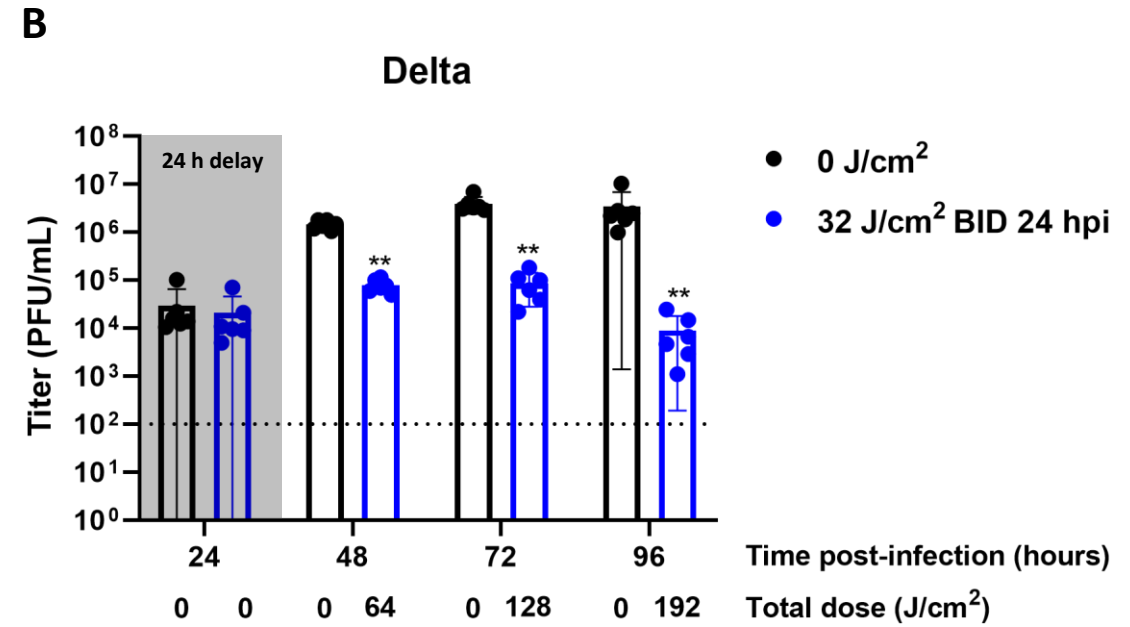

Source: https://www.biorxiv.org/content/10.1101/2022.01.25.477616v1.full.pdf
