# Supplementary material for: Visible blue light inactivates SARS-CoV-2 variants and inhibits Delta replication in differentiated human airway epithelia
Source: bioRxiv or medRxiv preprint supplement (doi:10.1101/2022.01.25.477616), 2022-01-31

Supplementary Figure 1. Basal media formulation does not impact SARS-CoV-2 Beta inactivation by 425 nm light.

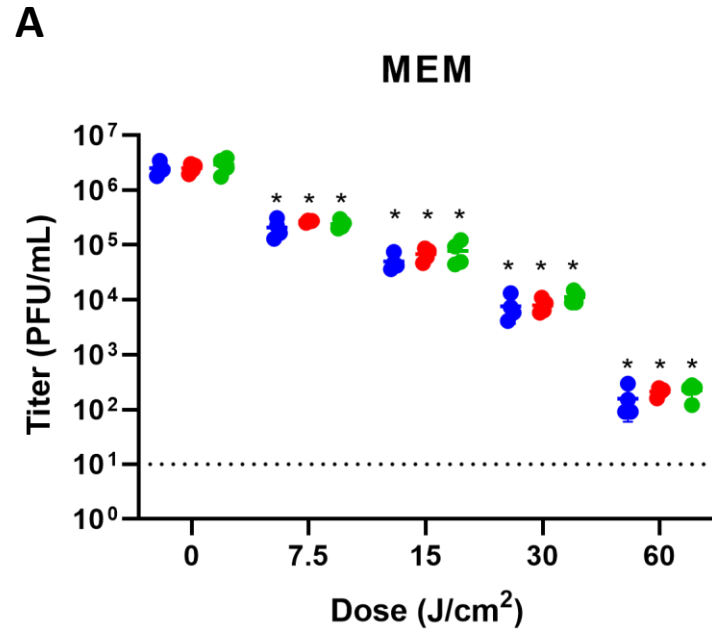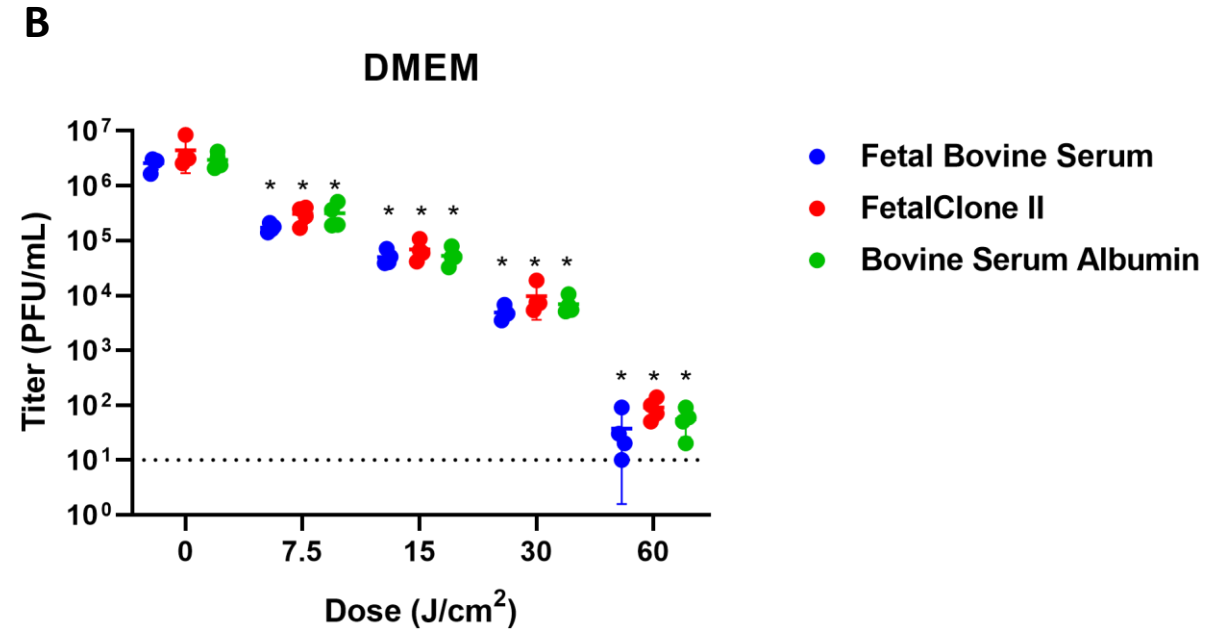

Supplementary Figure 2. 425 nm light inhibits cell-free SARS-CoV-2 cell entry in an ACE-2-dependent manner.

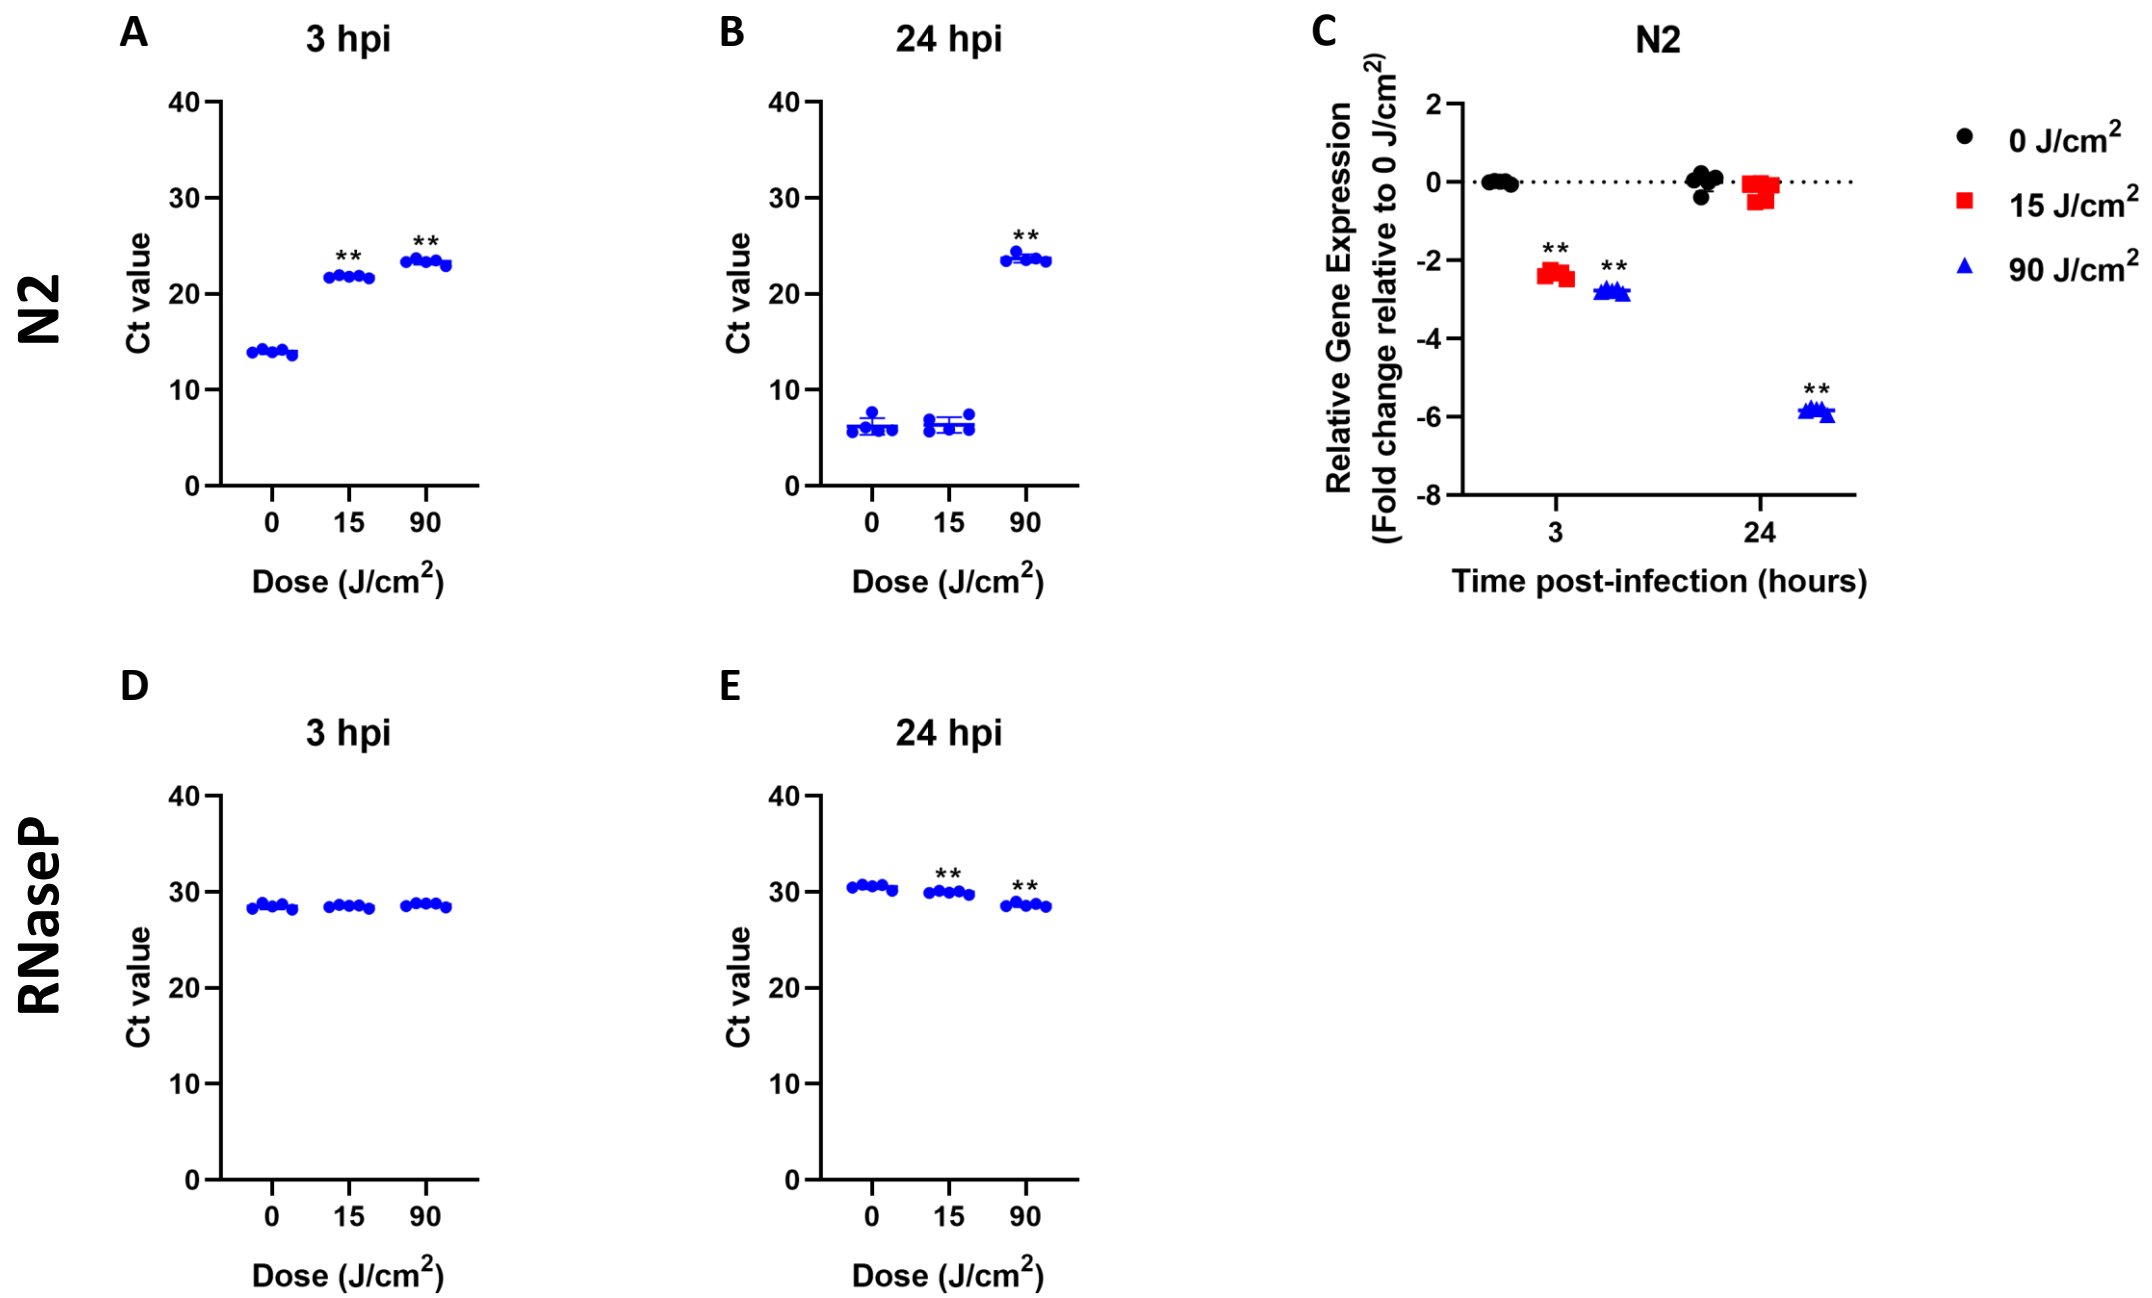

Supplementary Figure 3. SARS-CoV-2 WA1 replication in different tracheobronchial tissue models and susceptibility to 425 nm blue light.

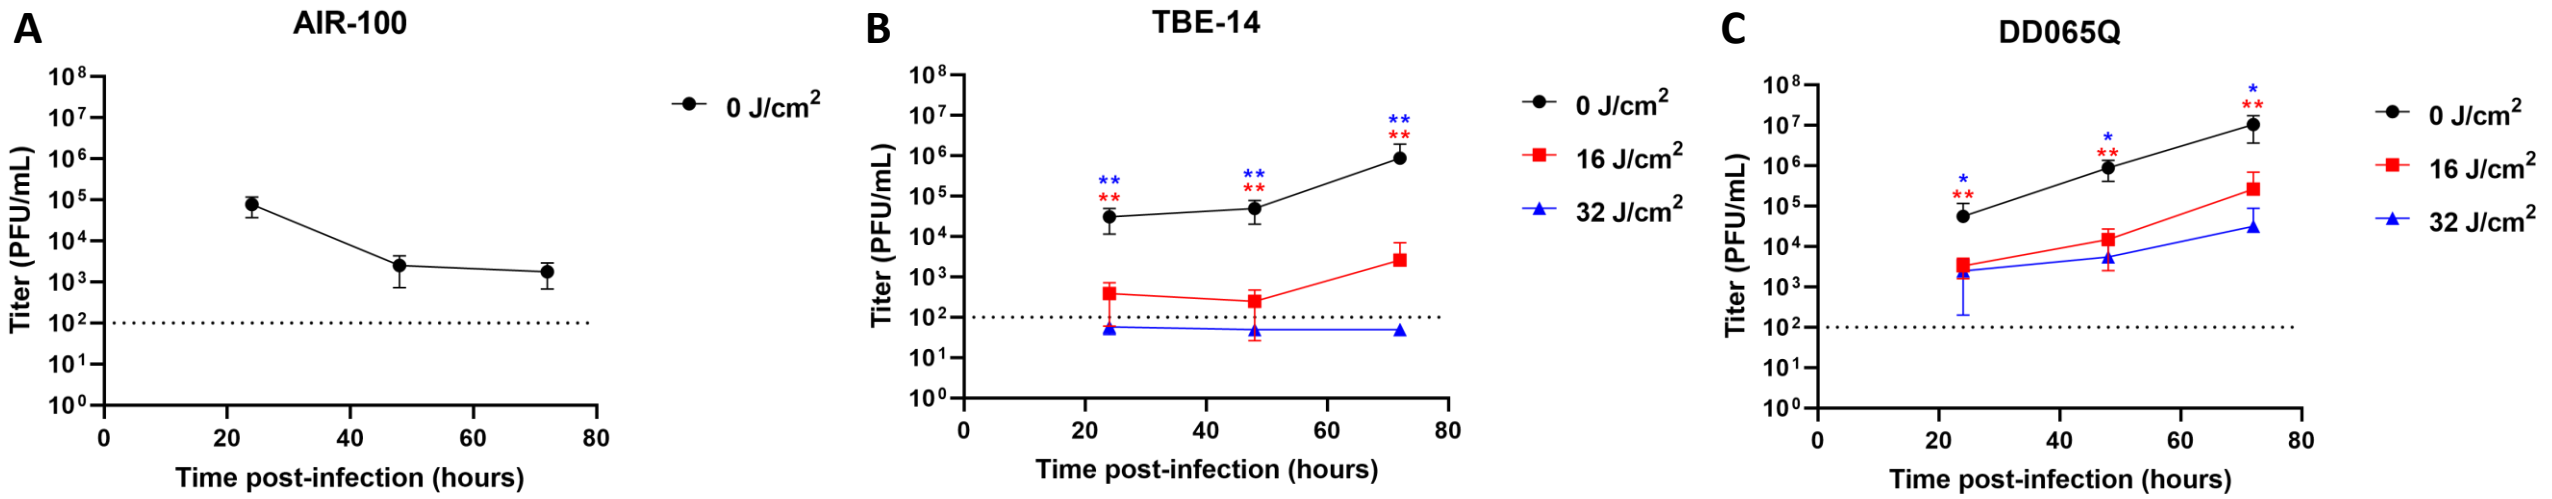

Supplement: Supplementary file [file media-2.pdf]
